# Supplementary material
Source: publisher site journal article supplement (https://www.spandidos-publications.com/1967/downloadSupplementary)
Supplement: Supplementary file 1 [file downloadSupplementary]

## Sheet: Supplemental table 2
Table SII. Differentially expressed mRNAs in patients with SLN(+/-) metastasis.
Gene	SLN(-), raw	SLN(+), raw	SLN(-), normalized	SLN(+), normalized	Fold-change, SLN(+)/SLN(-)	Up/downregulation, SLN(+)/SLN(-)	P-value	FDR
KRT19	7	5743	0.879993	624.543	709.713	Up	0	0
AGR2	10	5280	1.88122	859.244	456.747	Up	0	0
LINC01087	11	3578	0.578546	162.79	281.378	Up	0	0
LRP2	6	1356	0.0705145	13.7857	195.502	Up	0	0
MUC16	66	13690	0.278551	49.9812	179.433	Up	0	0
PRLR	15	2808	0.237387	38.4419	161.938	Up	0	0
SHANK2	10	1775	0.176387	27.0837	153.547	Up	0	0
SORD	36	5949	2.2972	328.384	142.95	Up	0	0
STC2	15	2086	0.519159	62.4547	120.3	Up	0	0
EPCAM	11	1456	1.18403	135.573	114.501	Up	0	0
PROM1	13	1656	0.564721	62.229	110.194	Up	0	0
TACSTD2	13	1524	1.16024	117.661	101.411	Up	0	0
CRABP2	14	1427	2.45165	216.17	88.1735	Up	0	0
ERBB3	16	1519	0.513946	42.2083	82.1258	Up	0	0
ERBB2	52	4474	1.95329	145.379	74.4277	Up	0	0
CA12	10	813	0.439354	30.8992	70.3287	Up	1.6e-201	1.39e-199
SHROOM3	11	829	0.184605	12.0351	65.1934	Up	3.22e-204	2.9e-202
GREB1	12	884	0.261624	16.6721	63.7255	Up	2.91e-217	2.95e-215
CDC6	27	1708	1.63543	89.4946	54.7225	Up	0	0
KCNJ3	12	701	0.468163	23.6579	50.5334	Up	6.38e-169	4.51e-167
KRT8	29	1692	2.49433	125.892	50.4713	Up	0	0
ARHGEF38	9	494	0.305044	14.484	47.4817	Up	1.11e-118	5.06e-117
FSIP1	10	546	0.657392	31.0498	47.2318	Up	5.88e-131	3.06e-129
MUC5B	7	381	0.0722522	3.40189	47.0835	Up	9.43e-92	3.17e-90
DNAH5	7	363	0.0831227	3.72881	44.8591	Up	5.04e-87	1.62e-85
CXCL11	7	336	0.808538	33.5725	41.5225	Up	6.03e-80	1.77e-78
DHCR24	35	1590	1.51011	59.3446	39.2981	Up	0	0
ESR1	57	2581	1.63042	63.8639	39.1701	Up	0	0
MTL5	7	315	0.357095	13.9008	38.9273	Up	1.87e-74	5.07e-73
SLC39A6	533	23872	27.2278	1054.91	38.7439	Up	0	0
PARD6B	39	1707	1.56274	59.1695	37.8626	Up	0	0
EHF	58	2338	1.96764	68.6127	34.8705	Up	0	0
RAB27B	23	897	0.607348	20.4901	33.737	Up	1.6e-205	1.45e-203
SOX9	19	726	0.893127	29.5215	33.0541	Up	3.8e-166	2.61e-164
TMC5	6	227	0.225701	7.38669	32.7278	Up	8.41e-53	1.54e-51
TTC39A	12	450	0.779175	25.276	32.4394	Up	2.97e-103	1.14e-101
PPM1E	20	747	0.565086	18.2577	32.3097	Up	2.39e-170	1.72e-168
MYH14	7	259	0.187279	5.99421	32.0069	Up	7.05e-60	1.48e-58
S100A1	7	257	2.17924	69.2122	31.7597	Up	2.33e-59	4.86e-58
CLDN1	27	976	1.4464	45.2288	31.27	Up	4.99e-221	5.22e-219
CMYA5	20	679	0.286882	8.4253	29.3685	Up	9.33e-153	5.95e-151
PERP	50	1696	2.14928	63.0654	29.3425	Up	0	0
MGP	467	15249	58.6284	1656.05	28.2466	Up	0	0
GATA2-AS1	6	190	0.470545	12.8898	27.3933	Up	3.08e-43	4.7e-42
NEBL	45	1389	0.903049	24.1125	26.7013	Up	4e-306	6.35e-304
SOX11	6	180	0.127256	3.30249	25.9515	Up	1.15e-40	1.65e-39
SEMA3C	35	1018	1.25094	31.4744	25.1606	Up	2.21e-222	2.33e-220
FAM110C	8	232	0.373302	9.36483	25.0865	Up	9.5e-52	1.71e-50
SERTAD4	12	347	1.10513	27.6441	25.0144	Up	1.07e-76	3.03e-75
ANXA3	7	199	0.800043	19.6748	24.5922	Up	2.04e-44	3.19e-43
DIO2	27	730	0.783578	18.3266	23.3884	Up	8.85e-158	5.8e-156
MARVELD2	7	189	0.599292	13.9973	23.3564	Up	7.33e-42	1.09e-40
NOS1AP	10	270	0.332658	7.76968	23.3564	Up	3.04e-59	6.34e-58
CFB	52	1389	3.66047	84.582	23.1069	Up	4.63e-298	6.99e-296
KLF5	39	1007	2.02245	45.1735	22.3361	Up	4.07e-215	4.05e-213
EPB41L4B	9	232	0.286902	6.39766	22.2991	Up	1.19e-50	2.1e-49
IQGAP3	21	538	0.641674	14.2206	22.1618	Up	1.78e-115	7.83e-114
EGF	12	306	0.397473	8.76778	22.0588	Up	3.09e-66	7.25e-65
VNN1	20	507	0.962145	21.0989	21.9291	Up	1.11e-108	4.52e-107
DSG2	39	948	1.27579	26.8266	21.0274	Up	3.8e-200	3.28e-198
GATA3	63	1528	3.79486	79.6198	20.9809	Up	0	0
EPPK1	46	1093	1.06305	21.8503	20.5544	Up	2.07e-229	2.34e-227
PKIB	8	189	0.74118	15.1474	20.4368	Up	8.46e-41	1.22e-39
RASEF	51	1196	1.69138	34.3119	20.2863	Up	3.6e-250	4.59e-248
ERBB4	16	369	0.248158	4.95082	19.9503	Up	5.72e-78	1.64e-76
S100A9	18	404	5.76887	112.006	19.4156	Up	9.93e-85	3.08e-83
MAP7	19	418	0.762492	14.5111	19.0311	Up	3.14e-87	1.01e-85
CCDC113	9	197	0.31605	5.98441	18.935	Up	8.55e-42	1.27e-40
INHBB	7	151	0.404143	7.54147	18.6604	Up	3.11e-32	3.45e-31
CRISPLD1	18	387	0.768916	14.3008	18.5986	Up	1.87e-80	5.53e-79
ADAMTS15	15	322	0.488701	9.07506	18.5698	Up	3.69e-67	8.79e-66
GRHL1	30	642	1.5389	28.4882	18.5121	Up	2.47e-132	1.3e-130
KIAA1324	24	513	0.631141	11.6701	18.4905	Up	5.04e-106	2.01e-104
PGR	33	703	0.468091	8.62608	18.4282	Up	1.32e-144	7.97e-143
LOC90246	7	147	0.470374	8.54486	18.1661	Up	3.14e-31	3.4e-30
ENPP5	20	416	0.95371	17.1602	17.9931	Up	1.01e-85	3.2e-84
TRPS1	603	12535	11.132	200.181	17.9825	Up	0	0
CATSPERB	11	227	0.561459	10.0229	17.8515	Up	2.5e-47	4.17e-46
CDS1	16	326	0.652003	11.4918	17.6254	Up	3.64e-67	8.69e-66
CD24	404	8107	30.6563	532.158	17.3588	Up	0	0
CXADR	27	532	0.869701	14.8238	17.0447	Up	8.47e-108	3.44e-106
TRIM36	14	274	0.583489	9.87864	16.9303	Up	3.88e-56	7.65e-55
ANKS1B	36	677	1.34954	21.954	16.2678	Up	3.64e-135	1.99e-133
SHC4	7	130	0.284124	4.56453	16.0652	Up	5.52e-27	5.23e-26
ISG15	9	167	2.49898	40.1124	16.0515	Up	2.7e-34	3.23e-33
CDH1	177	3182	6.79784	105.716	15.5514	Up	0	0
KCNQ3	28	501	0.460338	7.12522	15.4782	Up	3.81e-99	1.4e-97
ST6GALNAC2	6	105	0.5271	7.97945	15.1384	Up	1.03e-21	8.15e-21
RARRES1	40	695	4.8473	72.8562	15.0303	Up	7.56e-136	4.14e-134
CAP2	8	137	0.488733	7.24009	14.814	Up	8.52e-28	8.29e-27
SPTBN2	14	235	0.329089	4.77853	14.5205	Up	1.77e-46	2.88e-45
PPP1R3C	22	369	1.58116	22.9415	14.5093	Up	3.77e-72	9.8e-71
HSPA4L	13	216	0.735173	10.5668	14.3732	Up	1.03e-42	1.55e-41
C1orf226	8	131	0.358554	5.079	14.1652	Up	2.55e-26	2.36e-25
LINC01554	7	114	0.675611	9.51799	14.088	Up	4.93e-23	4.09e-22
CACNA1D	14	226	0.335225	4.68121	13.9644	Up	2.86e-44	4.44e-43
CXXC4	12	189	0.397829	5.42025	13.6246	Up	5.47e-37	7.16e-36
MARVELD3	7	109	0.482112	6.49409	13.4701	Up	8.27e-22	6.54e-21
TMEM144	12	186	0.668804	8.96752	13.4083	Up	2.95e-36	3.77e-35
TFCP2L1	27	417	0.537686	7.18362	13.3602	Up	1.98e-79	5.76e-78
AR	78	1199	1.35361	17.9995	13.2974	Up	4.95e-225	5.33e-223
CBS	7	107	0.499795	6.60876	13.2229	Up	2.54e-21	1.98e-20
NDUFC2	68	1036	5.08075	66.9608	13.1793	Up	3.81e-194	3.16e-192
IFI27	7	106	1.79788	23.551	13.0994	Up	4.46e-21	3.43e-20
CDH3	37	559	1.60014	20.9127	13.0693	Up	3.03e-105	1.19e-103
STC1	47	708	2.2418	29.2128	13.031	Up	9.51e-133	5.02e-131
ARFGEF3	103	1534	1.27988	16.4892	12.8834	Up	1.3e-284	1.91e-282
DCHS2	17	253	0.352751	4.54131	12.874	Up	3.13e-48	5.32e-47
SGMS2	84	1245	2.49256	31.9579	12.8213	Up	5.61e-231	6.41e-229
EDARADD	11	163	0.703621	9.01936	12.8185	Up	1.6e-31	1.75e-30
PTPRZ1	11	162	0.249316	3.17625	12.7399	Up	2.8e-31	3.04e-30
FOXC1	24	348	1.2868	16.1407	12.5432	Up	2.87e-65	6.63e-64
ADGRG1	12	173	0.518843	6.47057	12.4712	Up	4.26e-33	4.87e-32
IRX3	8	115	0.640985	7.97073	12.4351	Up	2.04e-22	1.65e-21
GREB1L	14	201	0.427783	5.31292	12.4197	Up	3.48e-38	4.72e-37
ANKRD22	6	86	0.27857	3.45401	12.3991	Up	4.64e-17	3e-16
PPM1H	34	487	1.0141	12.5653	12.3906	Up	2.24e-90	7.44e-89
IL17RD	36	513	0.763449	9.41102	12.327	Up	5.82e-95	2.06e-93
TACC2	21	299	0.400517	4.93304	12.3167	Up	5.77e-56	1.13e-54
FRK	22	312	1.42799	17.5185	12.268	Up	2.92e-58	5.96e-57
STARD10	31	438	2.88363	35.2447	12.2223	Up	4.39e-81	1.31e-79
ITGB8	56	786	1.17987	14.3256	12.1416	Up	6.36e-144	3.81e-142
NAT1	37	519	2.92527	35.4955	12.1341	Up	1.45e-95	5.18e-94
EFNA1	7	98	0.826609	10.0108	12.1107	Up	3.89e-19	2.76e-18
BAMBI	9	125	0.965382	11.5987	12.0146	Up	5.28e-24	4.54e-23
LTF	54	746	3.84369	45.9341	11.9505	Up	5.69e-136	3.13e-134
ALDH1A3	51	702	2.61468	31.1334	11.9072	Up	6.78e-128	3.39e-126
MIEN1	14	191	3.43361	40.5227	11.8018	Up	8.97e-36	1.13e-34
2018-09-03	8	109	0.317739	3.74498	11.7863	Up	5.72e-21	4.39e-20
TICRR	31	418	0.859597	10.0266	11.6642	Up	2.83e-76	7.92e-75
CFAP43	9	121	0.310218	3.60788	11.6301	Up	4.85e-23	4.02e-22
SIX1	14	188	0.963506	11.1925	11.6164	Up	4.71e-35	5.78e-34
TRNP1	7	92	0.664171	7.55113	11.3692	Up	1.08e-17	7.2e-17
HOMER2	21	275	1.9495	22.0841	11.3281	Up	3.38e-50	5.91e-49
C3orf52	15	196	1.21768	13.7638	11.3033	Up	3.7e-36	4.71e-35
TRIP13	8	104	0.618993	6.961	11.2457	Up	9.07e-20	6.61e-19
TMEM30B	25	320	1.04077	11.5241	11.0727	Up	1.02e-57	2.06e-56
NPNT	220	2713	8.68931	92.6946	10.6677	Up	0	0
OASL	13	159	1.15301	12.1991	10.5802	Up	6.24e-29	6.29e-28
ENPP1	98	1195	2.43518	25.687	10.5483	Up	1.81e-207	1.69e-205
NCAM2	7	85	0.258791	2.71839	10.5042	Up	5.06e-16	3.12e-15
DNAH14	53	641	0.710835	7.43691	10.4622	Up	9.73e-112	4.06e-110
GALNT13	13	157	0.423317	4.42246	10.4472	Up	1.86e-28	1.85e-27
MYO10	101	1218	1.63406	17.0466	10.432	Up	1.49e-210	1.43e-208
CMBL	16	191	0.731107	7.54981	10.3266	Up	3.51e-34	4.16e-33
CHMP4C	11	131	1.10253	11.3582	10.302	Up	7.57e-24	6.46e-23
CYB5R2	7	83	0.760558	7.80108	10.257	Up	1.51e-15	9.09e-15
CCL28	112	1327	6.44015	66.0071	10.2493	Up	1.04e-227	1.14e-225
ST6GALNAC5	13	154	1.18308	12.1236	10.2475	Up	9.51e-28	9.24e-27
ASS1	6	71	0.600404	6.146	10.2364	Up	1.83e-13	9.84e-13
HMGN5	38	445	3.30533	33.4836	10.1302	Up	3.95e-77	1.12e-75
GOLM1	263	3077	15.7599	159.503	10.1208	Up	0	0
MAPT	35	408	0.949721	9.57702	10.084	Up	1.01e-70	2.56e-69
BCAS1	13	151	0.691803	6.95117	10.0479	Up	4.85e-27	4.61e-26
PSMD3	90	1033	7.61005	75.5592	9.92887	Up	1.7e-175	1.27e-173
RAPGEFL1	15	172	0.743863	7.37857	9.91926	Up	1.81e-30	1.92e-29
STAC	11	126	0.659801	6.53782	9.90877	Up	1.14e-22	9.37e-22
ANO5	18	206	0.49972	4.94725	9.90003	Up	3.45e-36	4.39e-35
CCDC176	16	183	0.952298	9.42206	9.89403	Up	2.69e-32	3e-31
C4orf19	8	91	0.40665	4.00142	9.83996	Up	1.1e-16	7.02e-16
ANLN	173	1955	6.6775	65.2765	9.77558	Up	0	0
ESYT3	7	79	0.291088	2.84182	9.76272	Up	1.32e-14	7.6e-14
APOD	191	2140	31.2571	302.95	9.6922	Up	0	0
IGSF3	20	224	0.508943	4.93093	9.68858	Up	6.61e-39	9.13e-38
CDCP1	19	212	0.584619	5.64284	9.65215	Up	7.61e-37	9.94e-36
PPL	30	333	0.889344	8.53955	9.60207	Up	6.37e-57	1.27e-55
PEX11A	16	177	1.07906	10.3262	9.56963	Up	6.84e-31	7.32e-30
MACC1	102	1128	2.05965	19.7035	9.56645	Up	1.15e-188	9.01e-187
HMGB3	52	575	2.6159	25.0224	9.56547	Up	5.31e-97	1.91e-95
IFIT3	191	2081	13.1499	123.937	9.42499	Up	0	0
CAMK2N1	26	283	2.0451	19.2562	9.41575	Up	3.16e-48	5.37e-47
UGDH	127	1378	7.35067	68.9945	9.38615	Up	2.65e-228	2.98e-226
FAM160A1	21	227	0.848647	7.93553	9.3508	Up	7.25e-39	9.99e-38
FBP1	10	108	1.16305	10.8658	9.34256	Up	3.42e-19	2.43e-18
DNAH17	13	140	0.175182	1.63198	9.31594	Up	1.83e-24	1.59e-23
A1CF	8	86	0.155252	1.44373	9.2993	Up	1.64e-15	9.85e-15
UNC5C	79	848	1.47895	13.7329	9.28562	Up	1.5e-140	8.7e-139
ESRP2	24	255	1.10375	10.1448	9.19117	Up	3.5e-43	5.31e-42
ANXA9	7	73	0.709688	6.40227	9.02125	Up	3.34e-13	1.77e-12
ROCK1P1	8	83	0.60138	5.39733	8.97491	Up	8.16e-15	4.74e-14
SYT9	9	93	0.420495	3.75875	8.93887	Up	2.01e-16	1.26e-15
THSD4	144	1482	2.91188	25.9239	8.90282	Up	5.44e-240	6.61e-238
LYPD6	11	112	0.496138	4.36989	8.8078	Up	2.1e-19	1.5e-18
ERC2	6	61	0.180944	1.59134	8.79469	Up	4.03e-11	1.85e-10
TSKU	13	132	0.887091	7.79185	8.7836	Up	1.31e-22	1.07e-21
MREG	9	91	0.517995	4.53071	8.74663	Up	5.82e-16	3.57e-15
CYP4X1	39	393	3.05984	26.6728	8.71706	Up	2.73e-64	6.2e-63
MYB	119	1197	5.98314	52.0617	8.7014	Up	2.87e-192	2.33e-190
PTPN3	44	442	0.928314	8.06689	8.68984	Up	5.17e-72	1.34e-70
SH3D21	8	79	0.587294	5.01689	8.54238	Up	6.86e-14	3.79e-13
SLC7A2	153	1509	3.73708	31.8839	8.53178	Up	8.39e-240	1.01e-237
MGST1	38	374	5.09581	43.3854	8.51393	Up	1.24e-60	2.62e-59
GSDMB	236	2318	26.8402	228.049	8.49657	Up	0	0
MGAM2	28	275	0.657759	5.58835	8.49604	Up	6.04e-45	9.6e-44
ATAD3C	11	108	0.527123	4.47698	8.49323	Up	1.75e-18	1.21e-17
NR2E3	9	93	0.831743	7.05746	8.48514	Up	2.01e-16	1.26e-15
DSP	727	7097	13.8171	116.68	8.44466	Up	0	0
BAIAP2L1	18	175	0.906986	7.62795	8.41022	Up	5.35e-29	5.41e-28
ATP1B1	157	1523	13.1969	110.742	8.39155	Up	3.3e-240	4.04e-238
IFIT1	244	2355	9.77927	81.6487	8.34917	Up	0	0
PRRG4	22	212	0.734622	6.12377	8.33595	Up	1.07e-34	1.3e-33
ARHGEF37	32	308	1.21636	10.1275	8.32612	Up	1.03e-49	1.78e-48
ITGB5	33	315	1.39327	11.5046	8.25731	Up	1.27e-50	2.24e-49
LINC00202-1	8	76	0.408672	3.35847	8.21799	Up	3.35e-13	1.77e-12
POTEM	31	293	0.859984	7.03134	8.17613	Up	5.53e-47	9.11e-46
RARA	60	566	3.1911	26.0404	8.16032	Up	3.21e-89	1.05e-87
ANKRD31	11	103	0.337006	2.72976	8.10003	Up	2.44e-17	1.6e-16
SH3BP4	44	410	1.56988	12.6543	8.06071	Up	1.04e-64	2.39e-63
ELOVL6	29	270	1.58102	12.7334	8.05393	Up	4.05e-43	6.14e-42
KANK4	11	102	0.371402	2.97916	8.02139	Up	4.11e-17	2.67e-16
SYCP2	122	1122	4.11693	32.7528	7.95564	Up	4.18e-173	3.09e-171
DMC1	6	55	0.48643	3.85721	7.92964	Up	9.64e-10	3.99e-09
P2RY2	12	110	0.254017	2.01426	7.92964	Up	2.92e-18	1.99e-17
ZNF99	13	119	0.305039	2.41547	7.91855	Up	1.23e-19	8.91e-19
ALG8	48	437	5.09258	40.107	7.87557	Up	4.02e-68	9.82e-67
KIAA1804	24	216	0.764018	5.94824	7.78546	Up	2.98e-34	3.54e-33
CREB3L4	9	81	0.905998	7.05362	7.78546	Up	1.13e-13	6.15e-13
HILPDA	8	72	1.04773	8.15706	7.78546	Up	2.73e-12	1.36e-11
IFIT2	234	2100	12.3812	96.1187	7.76328	Up	0	0
ARHGEF35	40	357	2.98988	23.0837	7.72059	Up	2.04e-55	3.95e-54
RERG	44	391	3.49964	26.9023	7.68716	Up	2.03e-60	4.28e-59
PCDHB9	7	62	0.293464	2.24849	7.66189	Up	1.12e-10	4.99e-10
SCCPDH	43	380	3.21283	24.5609	7.64464	Up	1.32e-58	2.7e-57
MAGI1-AS1	9	79	2.81611	21.3833	7.59323	Up	3.2e-13	1.7e-12
SLC2A10	30	262	1.30997	9.89655	7.55478	Up	1.19e-40	1.71e-39
MIPOL1	33	288	0.97282	7.34435	7.54954	Up	1.6e-44	2.52e-43
SLC7A8	88	767	3.84168	28.9651	7.53971	Up	7.73e-116	3.41e-114
LOC101927045	24	208	2.09744	15.7247	7.49711	Up	1.87e-32	2.1e-31
FAT2	24	208	0.305324	2.28905	7.49711	Up	1.87e-32	2.1e-31
FAM84B	93	803	3.13774	23.4364	7.46921	Up	1.25e-120	5.85e-119
NEK2	31	267	2.67506	19.9308	7.45061	Up	4.03e-41	5.89e-40
XRCC2	34	292	2.04869	15.2203	7.42927	Up	9.1e-45	1.44e-43
RNF43	40	343	1.28733	9.54914	7.41782	Up	2.8e-52	5.09e-51
KRT5	18	154	1.44535	10.697	7.401	Up	3.02e-24	2.62e-23
KRT10	11	94	0.950545	7.02668	7.39226	Up	2.63e-15	1.57e-14
PEX5L	19	162	0.381743	2.81562	7.3757	Up	2.16e-25	1.94e-24
LOC101928979	6	51	1.07202	7.88253	7.35294	Up	7.76e-09	2.98e-08
SKA3	30	255	1.90056	13.9747	7.35294	Up	4.37e-39	6.07e-38
CIART	8	68	0.728407	5.35593	7.35294	Up	2.18e-11	1.02e-10
SPEG	6	51	0.104183	0.766049	7.35294	Up	7.76e-09	2.98e-08
NQO1	34	288	2.42664	17.7812	7.3275	Up	7.1e-44	1.09e-42
SPINT2	26	220	2.66816	19.5301	7.31967	Up	7.56e-34	8.85e-33
FAM227A	30	253	0.535392	3.90583	7.29527	Up	1.22e-38	1.67e-37
ST8SIA6	7	59	0.925944	6.7512	7.29115	Up	5.29e-10	2.24e-09
GTF2IRD1	12	101	0.636938	4.63745	7.28085	Up	3.1e-16	1.92e-15
LOC100132111	16	133	3.88803	27.9578	7.19074	Up	7.76e-21	5.92e-20
S100A11	116	962	36.1132	259.074	7.17396	Up	3.17e-141	1.86e-139
MELK	21	174	1.5392	11.0323	7.16757	Up	8.59e-27	8.08e-26
KCTD21-AS1	7	58	1.19526	8.56713	7.16757	Up	8.86e-10	3.68e-09
ADAM32	10	82	0.678124	4.81022	7.09342	Up	2.94e-13	1.56e-12
TOP2A	510	4175	16.3934	116.091	7.08155	Up	0	0
PLEKHA6	28	229	0.698392	4.94105	7.07489	Up	1.4e-34	1.69e-33
LRP11	71	579	3.62897	25.6004	7.05443	Up	6.18e-85	1.93e-83
SOX10	6	48	0.387682	2.68292	6.92041	Up	3.63e-08	1.32e-07
LINC01123	10	80	0.734409	5.08242	6.92041	Up	8.15e-13	4.21e-12
PLOD2	63	501	2.87022	19.7449	6.87922	Up	9.64e-73	2.54e-71
RAB3D	42	332	1.81765	12.4291	6.83803	Up	1.38e-48	2.36e-47
PLS1	9	71	0.430501	2.93787	6.8243	Up	1.95e-11	9.18e-11
EPS8L2	7	55	0.41212	2.80111	6.79683	Up	4.12e-09	1.62e-08
SCIN	6	47	0.341819	2.31625	6.77624	Up	6.06e-08	2.14e-07
BARX2	6	47	0.627926	4.25498	6.77624	Up	6.06e-08	2.14e-07
SH2D4A	18	141	0.979299	6.63596	6.77624	Up	2.3e-21	1.79e-20
CEP170B	12	94	0.330961	2.24267	6.77624	Up	1.1e-14	6.36e-14
TBX3	87	681	3.36367	22.7763	6.77127	Up	1.93e-97	7e-96
MYO5C	197	1542	5.22295	35.3652	6.77111	Up	2.2e-218	2.25e-216
KCTD3	197	1539	9.26738	62.6284	6.75794	Up	9.95e-218	1.01e-215
KIAA1549	25	195	0.372051	2.51038	6.7474	Up	6.02e-29	6.08e-28
AHNAK2	57	444	0.575459	3.87761	6.7383	Up	6.19e-64	1.39e-62
EXPH5	73	565	1.32517	8.87234	6.69526	Up	1.25e-80	3.71e-79
SHROOM2	11	85	0.273226	1.82638	6.68449	Up	2.61e-13	1.39e-12
SERHL2	10	77	0.876419	5.83773	6.6609	Up	3.74e-12	1.85e-11
KCNE4	16	123	0.931315	6.19333	6.65008	Up	1.25e-18	8.64e-18
C8orf48	6	46	0.767321	5.08892	6.63206	Up	1.01e-07	3.5e-07
DNM1P41	6	46	0.249673	1.65585	6.63206	Up	1.01e-07	3.5e-07
RDH10-AS1	14	107	0.79391	5.24891	6.61147	Up	2.49e-16	1.55e-15
SFRP1	306	2330	12.6677	83.4403	6.58683	Up	0	0
IFI6	30	228	6.45085	42.4104	6.57439	Up	3.89e-33	4.46e-32
CELSR2	21	159	0.368445	2.4132	6.54968	Up	1.71e-23	1.44e-22
TOM1L1	35	264	2.76596	18.0478	6.52496	Up	5.62e-38	7.59e-37
MRPL13	24	180	3.99836	25.9409	6.48789	Up	2.82e-26	2.61e-25
CTH	6	45	0.518479	3.36384	6.48789	Up	1.67e-07	5.72e-07
TMEM14A	6	45	1.09423	7.09922	6.48789	Up	1.67e-07	5.72e-07
PARD3	69	517	2.12309	13.7611	6.48162	Up	1.35e-72	3.54e-71
ECT2	85	634	3.56673	23.0135	6.45227	Up	2.02e-88	6.54e-87
PAQR5	16	119	0.540319	3.47632	6.43382	Up	9.29e-18	6.21e-17
RSAD2	131	974	6.8978	44.365	6.43176	Up	1.16e-134	6.24e-133
FAM174B	20	147	1.4068	8.94464	6.35813	Up	1.77e-21	1.39e-20
TM4SF1	273	2006	29.8547	189.768	6.35639	Up	1.7e-273	2.37e-271
IFT81	60	440	3.52461	22.3591	6.34371	Up	2.83e-61	6.08e-60
CTTN	201	1468	11.3288	71.5741	6.31789	Up	6.07e-200	5.22e-198
LYPD5	10	73	0.724909	4.57771	6.31488	Up	2.79e-11	1.3e-10
CHAF1B	27	196	2.19085	13.7578	6.27963	Up	5.64e-28	5.51e-27
DSC2	101	733	3.55488	22.3177	6.27805	Up	2.33e-100	8.72e-99
PGAP3	12	87	0.821886	5.15456	6.27162	Up	3.72e-13	1.96e-12
C1orf186	23	166	2.55451	15.9489	6.24342	Up	7.8e-24	6.65e-23
MFGE8	116	837	10.7849	67.3173	6.24179	Up	5.81e-114	2.5e-112
ZNF492	14	101	0.60988	3.8061	6.24073	Up	5.01e-15	2.94e-14
C3orf14	10	72	0.524608	3.26745	6.22837	Up	4.6e-11	2.1e-10
SORBS2	73	525	2.05659	12.7946	6.22126	Up	5.64e-72	1.46e-70
PRODH	6	43	0.460775	2.85659	6.19954	Up	4.57e-07	1.49e-06
SCUBE2	67	480	2.73147	16.9279	6.19738	Up	8.49e-66	1.98e-64
FGFR2	23	164	0.916058	5.65043	6.16819	Up	2.1e-23	1.77e-22
FAM83D	18	128	1.37037	8.42982	6.15148	Up	1.53e-18	1.06e-17
FAM198B	176	1250	6.72591	41.3229	6.14383	Up	1.03e-167	7.21e-166
SPTLC3	47	333	2.26045	13.8543	6.12898	Up	7.77e-46	1.25e-44
TTC30A	29	205	1.1486	7.0237	6.11502	Up	9.35e-29	9.39e-28
CXCL10	62	438	9.42871	57.6204	6.11117	Up	1.1e-59	2.3e-58
CCND1	644	4531	27.7667	168.995	6.08626	Up	0	0
SDC1	33	232	1.85317	11.2702	6.08157	Up	3.02e-32	3.35e-31
KIAA1217	241	1693	5.74388	34.905	6.0769	Up	5.5e-225	5.89e-223
AMOT	98	688	2.60944	15.8472	6.07301	Up	1.85e-92	6.35e-91
KLHDC7B	8	56	0.494615	2.99507	6.05536	Up	9.53e-09	3.63e-08
C22orf23	6	42	0.558122	3.37963	6.05536	Up	7.53e-07	2.41e-06
AGPAT9	48	336	3.26577	19.7754	6.05536	Up	6.61e-46	1.07e-44
RAD51C	72	503	10.0715	60.8657	6.04335	Up	7.57e-68	1.83e-66
MSL1	641	4474	31.0305	187.356	6.03782	Up	0	0
RDH10	62	432	2.89309	17.438	6.02746	Up	2.08e-58	4.26e-57
KCTD1	32	222	1.72474	10.3507	6.0013	Up	1.11e-30	1.18e-29
PART1	19	131	0.596429	3.55728	5.9643	Up	1.29e-18	8.92e-18
GGCT	63	433	9.79011	58.2072	5.94551	Up	4.69e-58	9.5e-57
DNALI1	14	96	0.977327	5.79729	5.93178	Up	5.93e-14	3.28e-13
LINC01106	13	89	1.10175	6.52486	5.92228	Up	5.1e-13	2.67e-12
CDKN3	13	89	2.69811	15.979	5.92228	Up	5.1e-13	2.67e-12
ZNF883	19	130	1.47691	8.74148	5.91877	Up	2.1e-18	1.44e-17
SORT1	105	715	2.76517	16.2885	5.89059	Up	3.06e-94	1.07e-92
PCLO	101	687	0.920611	5.41693	5.88406	Up	1.49e-90	4.96e-89
DUSP4	39	264	1.12058	6.56181	5.85573	Up	1.13e-35	1.41e-34
ASRGL1	17	115	1.29959	7.60498	5.85182	Up	2.5e-16	1.56e-15
CENPF	469	3170	8.42361	49.2523	5.84694	Up	0	0
CRIP1	32	216	12.3799	72.2873	5.8391	Up	2.08e-29	2.13e-28
KIF23	65	438	3.2286	18.8199	5.82912	Up	5.36e-58	1.09e-56
CFAP53	10	67	1.01384	5.87606	5.79585	Up	5.43e-10	2.3e-09
SQLE	95	636	5.87749	34.0382	5.79129	Up	3.98e-83	1.21e-81
TRIL	33	220	1.20722	6.96206	5.76701	Up	1.06e-29	1.1e-28
C6	13	86	0.641242	3.6696	5.72265	Up	2.21e-12	1.11e-11
MYO5B	164	1083	3.18567	18.1982	5.71251	Up	4.27e-139	2.45e-137
PALM2	22	145	0.429195	2.44704	5.70148	Up	6.35e-20	4.67e-19
GALNT6	94	619	3.84577	21.9073	5.69646	Up	4.18e-80	1.23e-78
OCLN	107	704	3.07345	17.4927	5.69155	Up	8.05e-91	2.69e-89
EMP2	101	664	3.58147	20.3681	5.68707	Up	1.03e-85	3.24e-84
PEG10	205	1333	5.7196	32.1724	5.62494	Up	4.52e-169	3.22e-167
MANSC1	40	260	3.22028	18.1071	5.62284	Up	2.76e-34	3.3e-33
KHDRBS3	6	39	0.563794	3.17012	5.62284	Up	3.32e-06	9.94e-06
CYB561	15	97	0.879475	4.91978	5.594	Up	1.28e-13	6.96e-13
LRRC6	11	71	1.0284	5.74206	5.58351	Up	2.69e-10	1.17e-09
ALCAM	475	3062	17.8898	99.7607	5.5764	Up	0	0
POMT2	9	58	0.341469	1.90361	5.57478	Up	1.26e-08	4.75e-08
RET	14	90	0.461076	2.56406	5.56105	Up	1.1e-12	5.63e-12
SPATA12	10	64	0.766367	4.24286	5.53633	Up	2.34e-09	9.4e-09
FRMD3	38	243	1.32838	7.34829	5.53178	Up	8.24e-32	9.05e-31
MRPL36	8	51	2.40944	13.2873	5.5147	Up	1.11e-07	3.84e-07
C17orf58	19	121	2.24365	12.3603	5.50901	Up	1.66e-16	1.04e-15
TUSC3	52	330	2.47581	13.5916	5.48975	Up	1.92e-42	2.86e-41
SDC4	55	349	3.89389	21.3741	5.48915	Up	8.55e-45	1.35e-43
WIPI1	32	203	3.07566	16.8782	5.48767	Up	1.11e-26	1.04e-25
CMPK2	80	507	4.90841	26.9092	5.48226	Up	2.71e-64	6.17e-63
NUDT12	46	291	2.43043	13.3003	5.47239	Up	1.56e-37	2.08e-36
CASC3	532	3365	23.5358	128.779	5.47161	Up	0	0
CD109	149	942	3.01035	16.4635	5.46898	Up	8.49e-118	3.83e-116
SLC12A8	10	63	0.52685	2.87124	5.44982	Up	3.8e-09	1.5e-08
KITLG	272	1710	9.24112	50.2567	5.43838	Up	1.58e-211	1.53e-209
CYP2J2	7	44	0.697076	3.79033	5.43747	Up	9.82e-07	3.11e-06
DDR1	29	182	1.37367	7.45757	5.42894	Up	6.62e-24	5.67e-23
NAA38	11	69	2.0362	11.0489	5.42623	Up	7.08e-10	2.96e-09
GSTA4	12	75	1.6548	8.94682	5.40657	Up	1.32e-10	5.87e-10
MYOF	364	2272	9.83669	53.1126	5.39944	Up	4.9e-279	6.95e-277
SYNM	128	798	3.2187	17.3586	5.39306	Up	4.03e-99	1.48e-97
HOXC10	13	81	1.22716	6.61434	5.38994	Up	2.48e-11	1.16e-10
WDR31	9	56	0.663869	3.5733	5.38254	Up	3.32e-08	1.21e-07
RNF217-AS1	9	56	0.311553	1.67695	5.38254	Up	3.32e-08	1.21e-07
XYLB	19	118	0.953995	5.12526	5.37243	Up	6.99e-16	4.28e-15
MSR1	61	378	2.9993	16.0777	5.36048	Up	1.25e-47	2.09e-46
FLJ23867	21	130	1.42983	7.65684	5.35508	Up	2.53e-17	1.65e-16
PCDHB18P	6	37	0.347058	1.85138	5.33448	Up	8.77e-06	2.52e-05
PRC1	133	818	7.71001	41.0203	5.32039	Up	1.26e-100	4.75e-99
CHRNA5	7	43	0.357292	1.89861	5.31389	Up	1.59e-06	4.94e-06
PHOSPHO2-KLHL23	7	43	0.307768	1.63544	5.31389	Up	1.59e-06	4.94e-06
KIAA1161	37	227	1.06163	5.63429	5.30721	Up	5.05e-29	5.12e-28
PRC1-AS1	8	49	0.96819	5.1299	5.29844	Up	2.91e-07	9.69e-07
MALSU1	8	49	1.95946	10.3821	5.29844	Up	2.91e-07	9.69e-07
HES1	16	98	2.02518	10.7303	5.29844	Up	2.67e-13	1.42e-12
PPP2R2C	17	104	0.708363	3.74871	5.29208	Up	5.05e-14	2.81e-13
SPR	9	55	1.14073	6.03036	5.28643	Up	5.36e-08	1.91e-07
IQCA1	9	55	0.497852	2.63186	5.28643	Up	5.36e-08	1.91e-07
TPD52L1	18	110	2.39298	12.6503	5.28643	Up	9.57e-15	5.53e-14
LRRC37A6P	10	61	0.286527	1.51195	5.27681	Up	9.93e-09	3.77e-08
ZNF552	96	585	7.54793	39.7882	5.27141	Up	5.42e-72	1.4e-70
HSPA1A	312	1893	23.7531	124.669	5.24853	Up	2.83e-228	3.16e-226
MPZL2	46	279	2.97327	15.5999	5.24673	Up	4.68e-35	5.74e-34
MYO6	411	2491	8.7744	46.0036	5.24293	Up	1.54e-299	2.38e-297
ABHD11	21	127	2.37082	12.403	5.2315	Up	1.05e-16	6.69e-16
C1orf21	164	991	2.94214	15.3793	5.22723	Up	4.8e-120	2.22e-118
HJURP	33	199	1.91361	9.98239	5.21652	Up	2.48e-25	2.22e-24
S100A16	39	235	6.75285	35.1992	5.21249	Up	1.24e-29	1.28e-28
KIF21A	83	498	2.31121	11.9959	5.19031	Up	7.07e-61	1.51e-59
DLGAP1-AS5	7	42	0.402009	2.08655	5.19031	Up	2.57e-06	7.8e-06
UCA1	6	36	0.479493	2.48871	5.19031	Up	1.42e-05	3.97e-05
MED24	111	666	5.52533	28.6782	5.19031	Up	7.56e-81	2.25e-79
ACTG2	11	66	1.5283	7.93235	5.19031	Up	2.97e-09	1.18e-08
UBE2C	8	48	1.66786	8.65672	5.19031	Up	4.7e-07	1.53e-06
CHN2	32	192	1.69899	8.81828	5.19031	Up	2.07e-24	1.8e-23
LONRF2	114	682	1.51534	7.84207	5.17513	Up	1.4e-82	4.26e-81
WIPF2	241	1439	8.06638	41.6643	5.16518	Up	5.07e-172	3.69e-170
PBX1	349	2083	9.34935	48.2711	5.16304	Up	4.46e-248	5.64e-246
ARHGEF5	36	214	1.21306	6.23786	5.14225	Up	7.17e-27	6.77e-26
LAD1	14	83	0.91192	4.6768	5.12852	Up	3.13e-11	1.45e-10
SPTSSA	162	956	11.8223	60.3514	5.10487	Up	6.16e-114	2.64e-112
IDH2	198	1162	20.2293	102.698	5.07672	Up	1.51e-137	8.51e-136
HIST2H2BE	66	387	5.49033	27.8489	5.07235	Up	6.58e-47	1.08e-45
TOB1	344	2007	28.4626	143.65	5.04697	Up	3.44e-235	4.1e-233
PHOSPHO2	17	99	2.50495	12.6191	5.03765	Up	5.37e-13	2.81e-12
MCM10	36	209	1.46314	7.34803	5.0221	Up	7.45e-26	6.81e-25
ITGA2	80	464	1.87028	9.38377	5.0173	Up	1.74e-55	3.37e-54
KIAA0895	15	87	0.621246	3.11698	5.0173	Up	1.51e-11	7.14e-11
TTC3P1	13	75	0.945718	4.71978	4.99068	Up	4.28e-10	1.83e-09
DLG3	82	472	2.51848	12.5403	4.97932	Up	4.17e-56	8.19e-55
CLDN12	69	397	3.48628	17.3518	4.97718	Up	1.96e-47	3.28e-46
LINC00665	8	46	0.845852	4.20731	4.97405	Up	1.21e-06	3.81e-06
LZTS2	8	46	0.51945	2.58377	4.97405	Up	1.21e-06	3.81e-06
XBP1	502	2884	51.0066	253.489	4.96974	Up	0	0
FAM84A	44	252	1.28076	6.34538	4.95439	Up	1.42e-30	1.51e-29
EXO1	40	229	2.13662	10.5814	4.95242	Up	6.53e-28	6.37e-27
NCMAP	7	40	0.324429	1.6037	4.94315	Up	6.66e-06	1.93e-05
CCDC168	7	40	0.060292	0.298033	4.94315	Up	6.66e-06	1.93e-05
ZNF365	7	40	0.307621	1.52062	4.94315	Up	6.66e-06	1.93e-05
KIF4A	24	137	0.986044	4.86909	4.938	Up	3.1e-17	2.02e-16
DLG5	107	610	2.64566	13.0473	4.9316	Up	1.62e-71	4.16e-70
RIMS2	13	74	0.353688	1.74161	4.92414	Up	6.83e-10	2.86e-09
IGF1R	477	2698	7.20955	35.2756	4.89289	Up	0	3.23e-306
PRMT5	48	271	3.39311	16.5717	4.88394	Up	1.98e-32	2.22e-31
AURKA	48	271	3.48503	17.0207	4.88394	Up	1.98e-32	2.22e-31
HFE	14	79	1.16514	5.68747	4.88136	Up	2.04e-10	8.95e-10
FAM221A	8	45	0.994217	4.83777	4.86591	Up	1.95e-06	5.99e-06
KAZN	13	73	0.399206	1.93918	4.8576	Up	1.09e-09	4.48e-09
PCDHGB8P	13	73	1.21846	5.91877	4.8576	Up	1.09e-09	4.48e-09
CLMN	252	1415	3.65497	17.7534	4.85733	Up	1.05e-161	7.08e-160
FAM210B	153	859	9.32853	45.3061	4.85673	Up	7.21e-99	2.64e-97
HDGF	395	2216	30.6012	148.509	4.85305	Up	5.52e-252	7.13e-250
B3GNT5	46	258	2.06319	10.0102	4.85181	Up	8.45e-31	9.03e-30
PLK4	53	296	2.53386	12.2417	4.83123	Up	5.3e-35	6.49e-34
UBXN10	7	39	0.232067	1.11846	4.81957	Up	1.07e-05	3.02e-05
CETN2	58	323	9.93112	47.8426	4.81744	Up	5.66e-38	7.62e-37
FBXO32	312	1735	8.49351	40.8577	4.81046	Up	2.2e-196	1.85e-194
CENPW	9	50	0.469748	2.25754	4.80584	Up	5.71e-07	1.85e-06
C9orf170	9	50	0.488213	2.34628	4.80584	Up	5.71e-07	1.85e-06
COX6C	206	1144	41.362	198.702	4.80398	Up	5.44e-130	2.81e-128
GINS1	40	222	2.249	10.7975	4.80104	Up	1.66e-26	1.55e-25
VDR	20	111	0.733245	3.52033	4.80104	Up	5.96e-14	3.3e-13
PCDHGB5	22	122	0.888671	4.26305	4.7971	Up	3.42e-15	2.03e-14
TBC1D9	857	4748	28.8881	138.449	4.79261	Up	0	0
PSAT1	15	83	1.22955	5.88539	4.78662	Up	9.74e-11	4.36e-10
ARMT1	63	348	4.47569	21.3866	4.77838	Up	1.52e-40	2.17e-39
MAOB	69	381	4.91706	23.4868	4.77659	Up	3.15e-44	4.89e-43
LINC00173	14	77	1.62113	7.71297	4.75778	Up	5.17e-10	2.19e-09
RGS6	6	33	0.183124	0.871262	4.75778	Up	5.91e-05	0.000153084
CXCL8	6	33	0.65076	3.09618	4.75778	Up	5.91e-05	0.000153042
OSR2	6	33	0.521894	2.48306	4.75778	Up	5.91e-05	0.000153063
GALE	6	33	0.680286	3.23665	4.75778	Up	5.91e-05	0.000153021
PRKAA2	30	164	0.593213	2.80527	4.72895	Up	9.63e-20	7e-19
FAM196A	27	147	1.13296	5.33593	4.70973	Up	8.66e-18	5.78e-17
CMSS1	21	114	3.15724	14.8264	4.69599	Up	4.51e-14	2.51e-13
AJUBA	34	184	1.47523	6.90622	4.68146	Up	8.17e-22	6.48e-21
GALNT3	119	643	6.73584	31.4846	4.67419	Up	2.69e-72	7.01e-71
FAM129B	30	162	1.39006	6.49336	4.67128	Up	2.4e-19	1.72e-18
LINC00950	10	54	0.352573	1.64696	4.67128	Up	2.67e-07	8.93e-07
DEPDC1	59	318	2.00635	9.35457	4.66248	Up	1.67e-36	2.15e-35
ZNF69	13	70	1.44908	6.74975	4.65797	Up	4.37e-09	1.71e-08
KIF14	71	382	1.80426	8.39744	4.65422	Up	1.79e-43	2.74e-42
PTHLH	8	43	0.789853	3.67254	4.64965	Up	4.94e-06	1.45e-05
FCGR3A	126	677	10.0955	46.9233	4.64794	Up	1.07e-75	2.97e-74
KIF20A	54	290	2.87696	13.3653	4.64565	Up	2.47e-33	2.85e-32
CENPP	22	118	1.19516	5.54534	4.63982	Up	2.15e-14	1.22e-13
CENPA	11	59	1.42349	6.60474	4.63982	Up	7.88e-08	2.76e-07
CDC42BPG	11	59	0.411858	1.91095	4.63982	Up	7.88e-08	2.76e-07
IGF2BP2	61	327	3.05784	14.18	4.63724	Up	2.45e-37	3.25e-36
PLCE1	37	198	0.856238	3.96369	4.62919	Up	3.6e-23	3.01e-22
FAH	6	32	0.617443	2.84864	4.61361	Up	9.42e-05	0.000236804
DACH1	15	80	0.529465	2.44274	4.61361	Up	3.87e-10	1.66e-09
INTU	19	101	1.07284	4.9334	4.59843	Up	1.97e-12	9.9e-12
H1F0	81	429	6.4287	29.4535	4.58157	Up	4.92e-48	8.35e-47
CAB39L	48	254	2.39772	10.9757	4.57756	Up	4.7e-29	4.76e-28
SAMD12-AS1	7	37	1.84661	8.44345	4.57242	Up	2.71e-05	7.31e-05
NRIR	11	58	2.44491	11.1517	4.56118	Up	1.25e-07	4.31e-07
CCDC34	15	79	1.30843	5.96111	4.55594	Up	6.11e-10	2.57e-09
AGAP1	81	426	1.38054	6.28081	4.54953	Up	1.91e-47	3.19e-46
ACSL3	604	3174	25.6121	116.428	4.54582	Up	0	0
SLC19A2	56	294	2.84812	12.9348	4.54152	Up	3.47e-33	3.98e-32
FAM162A	41	215	9.04761	41.0422	4.53625	Up	1.19e-24	1.04e-23
TSPAN13	234	1227	22.7509	103.198	4.53598	Up	4e-133	2.11e-131
ORMDL3	140	734	12.1035	54.8935	4.53534	Up	2.42e-80	7.13e-79
SLC39A11	55	288	3.65594	16.5604	4.52972	Up	1.79e-32	2.01e-31
PDC	9	47	1.35531	6.12259	4.51749	Up	2.29e-06	6.96e-06
OAT	158	825	13.9666	63.0853	4.51688	Up	8.61e-90	2.84e-88
PBK	15	78	1.31028	5.89399	4.49827	Up	9.63e-10	3.99e-09
C5orf30	43	223	2.64178	11.8515	4.4862	Up	2.7e-25	2.42e-24
FAP	22	114	1.46028	6.54575	4.48254	Up	1.32e-13	7.15e-13
PCDHB2	17	88	1.13328	5.07472	4.47791	Up	8.57e-11	3.85e-10
ERRFI1	91	471	5.37811	24.0797	4.47735	Up	1.27e-51	2.28e-50
PTGR2	63	326	4.49122	20.1041	4.4763	Up	3.25e-36	4.15e-35
LINC00472	197	1019	3.80829	17.0404	4.47456	Up	1.22e-109	4.97e-108
HOOK1	179	925	5.65161	25.264	4.47024	Up	1.3e-99	4.8e-98
RSPH3	36	186	3.058	13.6675	4.46943	Up	2.81e-21	2.18e-20
ARMCX2	70	361	4.5277	20.199	4.46119	Up	7.95e-40	1.12e-38
TTK	72	371	4.41025	19.6583	4.45742	Up	7.39e-41	1.07e-39
GAS8	40	206	2.23609	9.9618	4.45502	Up	2.37e-23	1.99e-22
DIAPH3	67	345	2.58339	11.5074	4.45437	Up	4.39e-38	5.93e-37
REPS2	46	235	1.0696	4.72686	4.41929	Up	2.9e-26	2.68e-25
HORMAD1	39	199	3.79981	16.7723	4.41398	Up	1.92e-22	1.55e-21
PRR11	108	551	3.0854	13.617	4.41336	Up	2.08e-59	4.36e-58
MTMR11	11	56	0.711496	3.13336	4.4039	Up	3.1e-07	1.03e-06
SLC44A3	13	66	1.00293	4.40465	4.3918	Up	2.7e-08	9.91e-08
POSTN	402	2038	21.994	96.4547	4.38551	Up	8.67e-214	8.5e-212
MEAT6	15	76	2.58998	11.3517	4.38293	Up	2.38e-09	9.53e-09
KIAA1841	63	319	2.54594	11.1517	4.38018	Up	7.4e-35	9.04e-34
IFI44L	1231	6229	38.6161	169.033	4.37726	Up	0	0
TBC1D30	37	187	0.874514	3.82339	4.37202	Up	5.1e-21	3.92e-20
NUPR1	130	657	26.3598	115.241	4.37184	Up	5.81e-70	1.47e-68
SLC31A1	80	402	3.09626	13.4591	4.34688	Up	3.04e-43	4.64e-42
ZNF713	45	226	1.83416	7.96848	4.34448	Up	5.68e-25	5.03e-24
MRPS30	127	636	14.0463	60.8495	4.33207	Up	2.9e-67	6.94e-66
PRSS16	7	35	0.451822	1.95425	4.32526	Up	6.78e-05	0.000174649
BTC	9	45	1.25799	5.44112	4.32526	Up	5.68e-06	1.66e-05
NDUFB9	24	120	6.17272	26.6986	4.32526	Up	7.16e-14	3.95e-13
RBKS	12	60	0.92849	4.01596	4.32526	Up	1.43e-07	4.93e-07
PRIMA1	9	45	0.455978	1.97222	4.32526	Up	5.68e-06	1.66e-05
ELOVL2	16	80	0.72644	3.14204	4.32526	Up	1.11e-09	4.56e-09
MTCL1	17	85	0.51604	2.232	4.32526	Up	3.3e-10	1.43e-09
ZDHHC9	63	314	2.51137	10.8278	4.31153	Up	6.8e-34	7.98e-33
CMTM4	77	383	1.75424	7.54813	4.30279	Up	6.29e-41	9.1e-40
NAALADL2	71	353	2.67297	11.4961	4.30089	Up	7.84e-38	1.05e-36
SELENBP1	30	149	2.82759	12.1485	4.29642	Up	8.36e-17	5.35e-16
DYRK3	22	109	1.79935	7.71191	4.28594	Up	1.24e-12	6.31e-12
WWC1	43	213	1.17996	5.05615	4.28502	Up	2.33e-23	1.96e-22
COX17	20	99	8.74347	37.4396	4.28201	Up	1.38e-11	6.53e-11
CYP51A1	728	3596	41.9654	179.317	4.27297	Up	0	0
USP18	49	241	4.45272	18.9447	4.25464	Up	4.41e-26	4.06e-25
BNIPL	11	54	0.843353	3.5814	4.24662	Up	7.62e-07	2.44e-06
TMPRSS11D	11	54	0.730926	3.10396	4.24662	Up	7.62e-07	2.44e-06
PHF7	9	44	0.747672	3.16201	4.22914	Up	8.91e-06	2.55e-05
OSBPL6	27	132	0.684154	2.89338	4.22914	Up	7.38e-15	4.29e-14
ZBED9	9	44	0.341259	1.44323	4.22914	Up	8.91e-06	2.55e-05
LOC101929125	8	39	2.09546	8.83682	4.21713	Up	3.07e-05	8.23e-05
WDR62	16	78	0.623559	2.62963	4.21713	Up	2.7e-09	1.08e-08
S100A13	38	185	7.84277	33.0293	4.21144	Up	3.42e-20	2.54e-19
FAM107A	15	73	0.766261	3.2259	4.20992	Up	9.08e-09	3.47e-08
GOLGA2P7	14	68	0.771436	3.24133	4.20168	Up	3.06e-08	1.12e-07
FBXO43	7	34	0.386524	1.62405	4.20168	Up	0.000106548	0.000266583
DLEU7	7	34	0.436289	1.83315	4.20168	Up	0.000106548	0.000266548
ATAD2	370	1796	12.2973	51.6363	4.19901	Up	1.11e-181	8.52e-180
CD9	577	2793	81.2034	340.026	4.18733	Up	9.43e-281	1.35e-278
ECHS1	25	121	3.47864	14.5645	4.18685	Up	1.27e-13	6.87e-13
ATP9A	149	721	3.61503	15.1322	4.18592	Up	8.1e-74	2.17e-72
HSPA1B	41	198	3.00869	12.569	4.17757	Up	2.29e-21	1.79e-20
HOOK2	29	140	2.05471	8.58072	4.17611	Up	1.62e-15	9.74e-15
ZSCAN12P1	22	106	1.00329	4.18168	4.16798	Up	4.66e-12	2.29e-11
CKS2	11	53	3.30222	13.7636	4.16798	Up	1.19e-06	3.74e-06
NET1	395	1903	18.2841	76.2005	4.16758	Up	4.1e-191	3.26e-189
PGRMC1	156	751	15.0329	62.6038	4.16445	Up	1.8e-76	5.07e-75
GK5	267	1285	4.5215	18.8242	4.16326	Up	1.52e-129	7.77e-128
IFI44	590	2834	63.2128	262.661	4.15518	Up	6.88e-283	9.99e-281
HACD3	221	1061	12.7395	52.9075	4.15303	Up	4.78e-107	1.93e-105
FAM189B	10	48	0.5797	2.40706	4.15225	Up	4.06e-06	1.21e-05
NEK11	24	115	1.50294	6.22975	4.14504	Up	6.53e-13	3.39e-12
RAB3B	19	91	0.273557	1.13338	4.14314	Up	1.73e-10	7.65e-10
GLYATL1	14	67	1.0933	4.52615	4.13989	Up	4.76e-08	1.71e-07
SYDE2	50	239	1.96269	8.1156	4.13495	Up	2.88e-25	2.57e-24
FAM110B	9	43	0.381025	1.57479	4.13302	Up	1.39e-05	3.9e-05
MRPL24	18	86	3.59076	14.8407	4.13302	Up	5.8e-10	2.44e-09
GAREM	26	124	0.68325	2.81884	4.12563	Up	9.16e-14	5.01e-13
CRYAB	17	81	3.21115	13.2354	4.12172	Up	1.94e-09	7.86e-09
BDKRB2	12	57	0.528733	2.17256	4.10899	Up	5.45e-07	1.77e-06
NME1	74	351	13.2729	54.4609	4.10315	Up	3.78e-36	4.8e-35
AIF1L	31	147	1.63091	6.69003	4.10202	Up	5.48e-16	3.37e-15
ARMC9	27	128	0.730071	2.99401	4.10099	Up	4.27e-14	2.38e-13
PTPRF	153	725	3.65879	14.9977	4.0991	Up	7.42e-73	1.96e-71
C9orf64	19	90	1.42077	5.82176	4.09761	Up	2.69e-10	1.17e-09
RGS22	18	85	0.775183	3.1666	4.08497	Up	9e-10	3.74e-09
CENPI	25	118	1.80379	7.36494	4.08304	Up	4.71e-13	2.47e-12
SLC27A6	7	33	0.456121	1.86011	4.0781	Up	0.00016683	0.000407769
STARD3	38	179	2.47958	10.1039	4.07485	Up	4.7e-19	3.31e-18
C3orf67	10	47	0.724909	2.94729	4.06574	Up	6.33e-06	1.84e-05
COA6	13	61	2.36616	9.60444	4.05909	Up	2.5e-07	8.39e-07
WBP5	31	145	5.26414	21.2998	4.04621	Up	1.31e-15	7.9e-15
MEX3A	37	173	1.11728	4.51905	4.0447	Up	2.39e-18	1.63e-17
TCEAL3	40	187	6.57509	26.5904	4.04412	Up	1.03e-19	7.46e-19
ALDOA	444	2074	34.3541	138.818	4.0408	Up	2.31e-202	2.02e-200
PLCD4	12	56	0.68554	2.76746	4.03691	Up	8.47e-07	2.7e-06
KLHL31	14	65	0.450799	1.81055	4.01631	Up	1.15e-07	3.97e-07
LOC101926889	24	111	2.03586	8.14521	4.00086	Up	3.73e-12	1.84e-11
MYO3B	8	37	0.233564	0.934458	4.00086	Up	7.49e-05	0.00019171
TRAM2-AS1	8	37	0.57834	2.31386	4.00086	Up	7.49e-05	0.000191736
HIST1H2BD	106	490	24.1107	96.4143	3.99882	Up	1.08e-48	1.84e-47
PAK1	139	638	7.38847	29.3361	3.97052	Up	1.73e-62	3.77e-61
RARRES3	39	179	9.42751	37.4307	3.97036	Up	1.23e-18	8.55e-18
ST14	39	179	2.18547	8.67711	3.97036	Up	1.23e-18	8.54e-18
CCDC58	8	38	2.05471	8.14856	3.96579	Up	4.8e-05	0.000126086
PCDHGA10	19	87	0.761005	3.01436	3.96103	Up	9.92e-10	4.1e-09
POLQ	137	626	2.88549	11.4055	3.95272	Up	4.31e-61	9.24e-60
IER3	62	283	9.24622	36.5091	3.94854	Up	1.82e-28	1.81e-27
GCSH	64	292	7.69516	30.3712	3.9468	Up	2.6e-29	2.65e-28
TARP	29	132	5.22182	20.5608	3.93748	Up	5.22e-14	2.9e-13
VLDLR	20	91	1.01719	4.00363	3.93598	Up	4.58e-10	1.95e-09
TCEAL4	184	837	19.6796	77.4402	3.93504	Up	9.18e-81	2.72e-79
LMNA	166	755	9.51269	37.4269	3.93442	Up	5.19e-73	1.38e-71
FAM71F2	11	50	0.349754	1.37525	3.93205	Up	4.46e-06	1.32e-05
RPGRIP1L	112	509	2.99127	11.7597	3.93135	Up	9.77e-50	1.69e-48
JUP	102	463	5.37693	21.1134	3.92666	Up	2.44e-45	3.9e-44
TXN	342	1552	72.8619	286.028	3.92561	Up	7.21e-148	4.46e-146
PRSS12	62	281	2.50717	9.82972	3.92064	Up	4.27e-28	4.2e-27
KIAA1522	17	77	0.580878	2.27598	3.91817	Up	1.11e-08	4.2e-08
DNAH7	33	149	0.492376	1.92314	3.90584	Up	1.58e-15	9.53e-15
ANK3	451	2036	4.90017	19.1361	3.9052	Up	2e-192	1.63e-190
PSMB5	28	126	3.75481	14.6165	3.89273	Up	2.65e-13	1.41e-12
PCDHGB4	18	81	0.727094	2.83038	3.89273	Up	5.1e-09	1.99e-08
ARRDC1	8	36	0.925779	3.60381	3.89273	Up	0.000116175	0.000289432
STEAP3	14	63	0.604328	2.35249	3.89273	Up	2.73e-07	9.13e-07
LAMA1	16	72	0.306388	1.19269	3.89273	Up	3.72e-08	1.35e-07
FAIM	37	166	4.48375	17.4016	3.88104	Up	4.82e-17	3.11e-16
ICA1	64	287	4.81691	18.6858	3.87922	Up	2.18e-28	2.17e-27
RAD51AP1	27	121	2.20051	8.53074	3.87671	Up	8.76e-13	4.5e-12
PIK3R3	271	1214	8.83075	34.2207	3.87518	Up	1.19e-114	5.17e-113
PAIP1	291	1302	19.2533	74.5187	3.87044	Up	1.1e-122	5.2e-121
IQCH	17	76	0.741617	2.86805	3.86729	Up	1.71e-08	6.35e-08
SRPX2	15	67	1.2666	4.89403	3.8639	Up	1.25e-07	4.31e-07
ENAH	785	3503	11.0208	42.5426	3.86022	Up	0	0
RACGAP1	59	263	3.28038	12.6494	3.85608	Up	5.36e-26	4.92e-25
POLE2	22	98	2.1861	8.42395	3.85341	Up	1.49e-10	6.62e-10
CKAP2L	29	129	1.11958	4.30814	3.84799	Up	1.88e-13	1.01e-12
CEP55	63	280	4.41631	16.9793	3.84467	Up	1.67e-27	1.61e-26
MTUS1	206	915	5.93463	22.8029	3.84234	Up	3.75e-86	1.19e-84
HRSP12	16	71	2.9266	11.2342	3.83867	Up	5.71e-08	2.03e-07
PPP1R9A	128	568	2.25024	8.63793	3.83867	Up	4.4e-54	8.3e-53
EHHADH	28	124	1.30327	4.99274	3.83094	Up	6.21e-13	3.23e-12
NEDD4L	108	478	2.35461	9.015	3.82865	Up	1.16e-45	1.87e-44
ENO4	12	53	0.774552	2.95929	3.82064	Up	3.12e-06	9.38e-06
MTHFD2	104	459	8.41669	32.1338	3.81787	Up	8.55e-44	1.32e-42
EFNA5	46	203	1.59447	6.08692	3.81751	Up	3.22e-20	2.39e-19
SLC24A3	22	97	1.04611	3.98997	3.81409	Up	2.29e-10	9.99e-10
MDH1B	10	44	0.724341	2.75701	3.80623	Up	2.34e-05	6.37e-05
LOC100506314	15	66	1.59143	6.05735	3.80623	Up	1.92e-07	6.52e-07
AK4	73	321	1.92905	7.33782	3.80386	Up	5.37e-31	5.77e-30
ECM1	8	35	0.664896	2.51637	3.7846	Up	0.000179542	0.000435488
PSRC1	8	35	0.847791	3.20855	3.7846	Up	0.000179542	0.000435432
CKS1B	56	245	11.2075	42.416	3.7846	Up	6.63e-24	5.68e-23
VEPH1	22	96	0.943491	3.56146	3.77477	Up	3.5e-10	1.51e-09
KCNIP4	28	122	2.15565	8.12499	3.76915	Up	1.45e-12	7.34e-12
DCBLD1	14	61	1.30887	4.93332	3.76915	Up	6.44e-07	2.08e-06
STEAP4	133	578	5.37947	20.2236	3.7594	Up	6.53e-54	1.23e-52
POLN	44	191	2.49898	9.38393	3.75511	Up	8.01e-19	5.6e-18
FAM104B	18	78	2.36914	8.88084	3.74856	Up	1.83e-08	6.82e-08
MLF1	15	65	1.1003	4.12455	3.74856	Up	2.94e-07	9.77e-07
CDCA8	12	52	0.892635	3.34609	3.74856	Up	4.79e-06	1.41e-05
MAGI3	154	667	3.94382	14.7763	3.74668	Up	9.53e-62	2.07e-60
DSTN	347	1501	36.7519	137.522	3.74191	Up	1.48e-136	8.27e-135
STIL	68	294	2.40667	9.00113	3.74008	Up	4.56e-28	4.48e-27
CIDEB	31	134	2.55694	9.56104	3.73926	Up	1.43e-13	7.74e-13
PRSS23	262	1132	8.42026	31.4711	3.73755	Up	2.55e-103	9.87e-102
ANKEF1	49	211	2.33779	8.70833	3.72502	Up	1.73e-20	1.3e-19
FASN	96	413	2.09893	7.81121	3.72152	Up	1.31e-38	1.8e-37
PCDHB4	24	103	1.14623	4.25538	3.71251	Up	1.13e-10	5.04e-10
ARHGEF28	21	90	0.611368	2.26656	3.70736	Up	1.77e-09	7.17e-09
VANGL1	68	291	1.44688	5.35623	3.70191	Up	1.59e-27	1.54e-26
SNCG	36	154	8.05965	29.8247	3.7005	Up	3.03e-15	1.8e-14
TMEM56	30	128	0.803437	2.96539	3.69089	Up	7.14e-13	3.7e-12
SIAH2	175	746	12.3518	45.5484	3.68759	Up	8.86e-68	2.14e-66
ZWINT	51	217	5.09516	18.7538	3.68071	Up	8.61e-21	6.55e-20
HSPA2	12	51	0.801405	2.94634	3.67647	Up	7.32e-06	2.12e-05
LCA5L	12	51	0.938702	3.45111	3.67647	Up	7.32e-06	2.12e-05
TMEM241	21	89	1.29793	4.75844	3.66617	Up	2.69e-09	1.07e-08
SMUG1	13	55	0.890047	3.25742	3.65983	Up	3.31e-06	9.94e-06
HK2	140	592	3.64999	13.3514	3.65793	Up	1.06e-53	1.97e-52
TGIF1	31	131	2.54898	9.3179	3.65554	Up	5e-13	2.62e-12
PKP2	49	207	2.04129	7.4597	3.6544	Up	9.15e-20	6.66e-19
TMEM9	9	38	0.801695	2.92814	3.65244	Up	0.00012313	0.000305907
RAB36	9	38	0.435458	1.59048	3.65244	Up	0.00012313	0.000305948
MAGED1	68	287	4.31829	15.7662	3.65103	Up	8.35e-27	7.85e-26
SUSD4	23	97	1.40511	5.1262	3.64826	Up	5.67e-10	2.39e-09
CLNS1A	921	3877	124.046	451.712	3.64148	Up	0	0
SSH3	10	42	0.642544	2.3345	3.63322	Up	5.51e-05	0.000143439
CDK1	102	428	9.86005	35.7903	3.62982	Up	5.59e-39	7.74e-38
MX1	736	3075	39.7153	143.538	3.61418	Up	5.39e-268	7.32e-266
ANO1	109	455	4.19234	15.1385	3.61099	Up	4.04e-41	5.88e-40
HSP90AA1	4313	17972	205.35	740.207	3.60462	Up	0	0
FMO2	140	583	4.88111	17.5833	3.60232	Up	4.25e-52	7.68e-51
FAHD1	50	208	5.43256	19.5497	3.59861	Up	1.46e-19	1.06e-18
TJP2	99	411	3.8746	13.9148	3.59127	Up	4.29e-37	5.64e-36
VWA1	20	83	0.793837	2.84985	3.58996	Up	1.35e-08	5.08e-08
CCNB1	54	224	4.60817	16.5358	3.58836	Up	6.78e-21	5.18e-20
CDC25A	14	58	0.698581	2.50356	3.58378	Up	2.29e-06	6.96e-06
TPX2	161	667	8.13021	29.1369	3.58378	Up	4.78e-59	9.91e-58
DDX58	967	4004	37.5992	134.675	3.58187	Up	0	0
WNK2	15	62	0.336634	1.20365	3.57555	Up	1.04e-06	3.27e-06
GTF2H2C_2	8	33	0.820518	2.92789	3.56834	Up	0.000423026	0.000977358
PPFIA1	483	1987	16.7075	59.4573	3.55871	Up	4.51e-171	3.27e-169
TSPAN6	18	74	0.80969	2.87952	3.55632	Up	9.79e-08	3.41e-07
ARHGEF34P	9	37	0.395889	1.40791	3.55632	Up	0.000188094	0.000455703
MXRA5	292	1198	5.51449	19.5714	3.54908	Up	1.36e-103	5.29e-102
ABCD3	212	869	10.8418	38.4439	3.5459	Up	1.46e-75	4.02e-74
HYLS1	31	127	2.78419	9.86696	3.54392	Up	2.61e-12	1.3e-11
ZNF703	32	131	1.76697	6.25737	3.5413	Up	1.2e-12	6.13e-12
LMO3	11	45	0.530699	1.87806	3.53885	Up	3.77e-05	0.00010026
SRD5A3	33	135	1.49534	5.2918	3.53885	Up	5.55e-13	2.9e-12
OTUD7B	188	768	5.41945	19.1514	3.53383	Up	9.6e-67	2.27e-65
COL22A1	24	98	0.697937	2.46532	3.53229	Up	9.01e-10	3.74e-09
ZNF443	63	257	4.37321	15.4325	3.52886	Up	2.32e-23	1.95e-22
SLC16A6	157	640	7.34086	25.8863	3.52632	Up	8.82e-56	1.72e-54
RMI1	66	269	3.49313	12.3159	3.52574	Up	2.32e-24	2.01e-23
EPB41L5	198	806	5.54185	19.5149	3.52137	Up	1.06e-69	2.67e-68
CYB5A	57	232	12.2282	43.0543	3.52091	Up	3.47e-21	2.68e-20
SOCS6	144	585	4.5551	16.0079	3.51427	Up	5.99e-51	1.06e-49
FARP1	181	733	6.67823	23.3953	3.50322	Up	3.37e-63	7.48e-62
RBM47	174	704	6.25887	21.9059	3.49998	Up	1.05e-60	2.22e-59
PTPRK	550	2223	16.5299	57.7948	3.49638	Up	1.42e-187	1.11e-185
LOC441666	100	404	2.77622	9.70237	3.49481	Up	1.75e-35	2.18e-34
CCZ1	26	105	2.63598	9.20874	3.49348	Up	2.86e-10	1.24e-09
PPIC	30	121	4.48845	15.6604	3.48904	Up	1.28e-11	6.1e-11
TPD52	447	1796	18.6174	64.7082	3.47569	Up	6.09e-151	3.81e-149
MORF4L2	396	1587	36.003	124.814	3.46676	Up	3.17e-133	1.68e-131
EMP1	202	809	13.3219	46.1537	3.46449	Up	9.48e-69	2.35e-67
BOC	9	36	0.356614	1.23396	3.46021	Up	0.000286054	0.000675816
PSMG1	28	112	4.542	15.7163	3.46021	Up	9.09e-11	4.08e-10
CA2	11	44	1.22099	4.22487	3.46021	Up	5.72e-05	0.000148426
TMEM45A	14	56	1.65533	5.72779	3.46021	Up	5.24e-06	1.54e-05
PIGX	73	292	4.36452	15.1022	3.46021	Up	8.21e-26	7.48e-25
ZNF165	27	108	2.10053	7.26826	3.46021	Up	1.98e-10	8.67e-10
LNP1	9	36	0.750708	2.5976	3.46021	Up	0.000286054	0.000675731
CKB	11	44	1.39518	4.8276	3.46021	Up	5.72e-05	0.000148405
TRIAP1	13	52	2.03385	7.03756	3.46021	Up	1.16e-05	3.27e-05
BZW2	73	292	7.20741	24.9391	3.46021	Up	8.21e-26	7.48e-25
HEBP2	75	299	10.8185	37.3095	3.44867	Up	2.65e-26	2.45e-25
FAM111B	270	1070	14.0212	48.0671	3.42817	Up	2.5e-89	8.19e-88
FNBP1L	315	1248	10.9023	37.365	3.42725	Up	7.42e-104	2.88e-102
DYNLT1	50	198	11.977	41.0283	3.4256	Up	8.52e-18	5.69e-17
CENPU	45	178	3.26337	11.1665	3.42176	Up	4e-16	2.48e-15
TSPAN2	20	79	1.15146	3.93448	3.41695	Up	6.98e-08	2.46e-07
LINC00476	37	146	0.853781	2.91434	3.41345	Up	1.92e-13	1.03e-12
CABP4	32	126	1.44719	4.92935	3.40614	Up	9.17e-12	4.4e-11
FKBP4	161	633	7.95852	27.0677	3.4011	Up	4.27e-53	7.87e-52
GPT2	26	102	1.20744	4.09765	3.39366	Up	9.67e-10	4e-09
NTN4	88	345	4.50162	15.2668	3.3914	Up	1.39e-29	1.44e-28
SHTN1	407	1595	14.0392	47.5939	3.39007	Up	1.26e-130	6.54e-129
PCDHGB1	12	47	0.483462	1.63803	3.38812	Up	3.88e-05	0.000102911
PRDX6	286	1119	31.6697	107.189	3.38459	Up	5.01e-92	1.7e-90
EPHB3	11	43	0.48203	1.63002	3.38157	Up	8.63e-05	0.000219468
SEMA3F	10	39	0.525951	1.7744	3.3737	Up	0.000192893	0.000466603
TUSC1	10	39	0.748681	2.52583	3.3737	Up	0.000192893	0.000466543
APOBEC3B	9	35	1.08213	3.64039	3.36409	Up	0.00043301	0.000994537
C9orf66	9	35	0.597386	2.00966	3.36409	Up	0.00043301	0.000994416
GPR63	18	70	0.546754	1.83933	3.36409	Up	5.03e-07	1.64e-06
TFRC	564	2189	19.965	67.0314	3.35744	Up	1.27e-176	9.7e-175
LRRN1	16	62	0.773944	2.59432	3.35207	Up	2.43e-06	7.39e-06
LOC442028	15	58	0.832992	2.78625	3.34487	Up	5.36e-06	1.57e-05
ZNRF3	15	58	0.415436	1.38958	3.34487	Up	5.36e-06	1.57e-05
CENPN	59	228	2.34938	7.85378	3.34291	Up	9.24e-20	6.73e-19
PCDH1	42	162	1.62045	5.40684	3.33663	Up	2e-14	1.14e-13
BTBD3	122	470	4.5958	15.3158	3.33258	Up	5.67e-39	7.85e-38
SKA1	27	104	1.71109	5.70143	3.33205	Up	9.9e-10	4.09e-09
TSPAN15	27	104	2.93876	9.7921	3.33205	Up	9.9e-10	4.09e-09
PCDHGB2	27	104	1.08495	3.61512	3.33205	Up	9.9e-10	4.09e-09
CCNE1	13	50	1.23473	4.10809	3.32712	Up	2.62e-05	7.11e-05
TTC8	26	100	2.02188	6.72704	3.32712	Up	2.16e-09	8.68e-09
TMEM254	51	196	3.83068	12.7351	3.32451	Up	4.31e-17	2.79e-16
TCEA3	19	73	2.00775	6.67299	3.32362	Up	3.43e-07	1.13e-06
XRCC6BP1	19	73	3.02893	10.067	3.32362	Up	3.43e-07	1.13e-06
MPP3	19	73	1.23935	4.11913	3.32362	Up	3.43e-07	1.13e-06
MBOAT2	98	376	4.76409	15.8119	3.31897	Up	2.35e-31	2.55e-30
SKA2	317	1216	19.7244	65.4517	3.3183	Up	1.2e-97	4.37e-96
KCNH1	24	92	0.547518	1.81559	3.31603	Up	1.02e-08	3.89e-08
FRS2	367	1405	9.71336	32.1678	3.31171	Up	2.79e-112	1.17e-110
SLIRP	29	111	10.333	34.213	3.31106	Up	3.12e-10	1.35e-09
NT5C3A	251	960	24.3016	80.4033	3.30856	Up	3.3e-77	9.38e-76
SH3BGRL	778	2973	69.7726	230.644	3.30565	Up	6.11e-235	7.24e-233
SIAE	55	210	3.34787	11.0578	3.30292	Up	4.4e-18	2.97e-17
ARL3	60	229	2.86408	9.4561	3.30161	Up	1.4e-19	1.01e-18
CHDH	26	99	1.29736	4.27332	3.29385	Up	3.21e-09	1.27e-08
CDK12	1376	5232	30.7203	101.045	3.28921	Up	0	0
PLK2	153	581	9.96949	32.7491	3.28493	Up	5.06e-47	8.38e-46
CDCA2	49	186	2.43583	7.99845	3.28367	Up	4.42e-16	2.73e-15
ERI2	88	334	4.64554	15.2525	3.28326	Up	1.07e-27	1.04e-26
CCNE2	68	258	4.61293	15.1401	3.28211	Up	9.9e-22	7.82e-21
SSX2IP	193	732	5.92372	19.4352	3.28092	Up	1.01e-58	2.07e-57
UAP1	168	637	13.3508	43.7904	3.27999	Up	2.64e-51	4.7e-50
PTGR1	38	144	4.9944	16.3721	3.27809	Up	9.64e-13	4.94e-12
MAOA	69	261	2.34641	7.67781	3.27215	Up	6.81e-22	5.41e-21
LOC339803	18	68	1.30177	4.25416	3.26797	Up	1.12e-06	3.53e-06
EFCAB11	45	170	2.8985	9.47222	3.26797	Up	9.6e-15	5.55e-14
SOX13	31	117	1.40748	4.59523	3.26487	Up	1.46e-10	6.46e-10
POLR2H	43	162	5.98776	19.5143	3.25903	Up	4.48e-14	2.5e-13
SLC6A8	17	64	0.881827	2.87181	3.25666	Up	2.47e-06	7.49e-06
LDLRAD3	55	207	2.61125	8.50156	3.25574	Up	1.43e-17	9.44e-17
CBWD1	189	711	19.1931	62.4591	3.25424	Up	1.48e-56	2.94e-55
MTBP	96	361	5.7508	18.7071	3.25295	Up	1.68e-29	1.72e-28
MAGI1	195	733	4.98414	16.207	3.25171	Up	3.36e-58	6.85e-57
MET	128	481	3.54558	11.5256	3.2507	Up	9.48e-39	1.3e-37
TYMS	41	154	4.78957	15.5624	3.24922	Up	2.09e-13	1.12e-12
KIF15	57	214	2.17918	7.0774	3.24774	Up	4.55e-18	3.07e-17
KCTD21	73	274	3.97394	12.903	3.24691	Up	1.03e-22	8.43e-22
BPHL	12	45	1.02736	3.33269	3.24394	Up	8.72e-05	0.000221699
RHBDF1	12	45	0.741675	2.40595	3.24394	Up	8.72e-05	0.000221729
SYNC	16	60	0.847062	2.74782	3.24394	Up	5.43e-06	1.59e-05
DNMT3B	16	60	0.682378	2.21359	3.24394	Up	5.43e-06	1.59e-05
PDCD6	119	446	18.4614	59.8542	3.24213	Up	6.12e-36	7.75e-35
DTL	65	243	2.61477	8.45605	3.23396	Up	3.18e-20	2.37e-19
GGH	41	153	5.0817	16.4043	3.22812	Up	3.09e-13	1.64e-12
PAPSS1	230	858	16.7319	53.9943	3.22702	Up	3.13e-67	7.47e-66
FZD1	37	138	1.57292	5.07488	3.22641	Up	4.57e-12	2.25e-11
MAMDC2	33	123	1.68671	5.43842	3.22428	Up	6.8e-11	3.08e-10
OAS3	462	1717	12.8687	41.3717	3.21492	Up	3.9e-132	2.05e-130
VMP1	606	2251	51.5474	165.635	3.21325	Up	1.59e-172	1.17e-170
TPBG	35	130	1.90868	6.1327	3.21305	Up	2.14e-11	1.01e-10
SLC20A2	66	245	3.05583	9.81282	3.21118	Up	3.22e-20	2.39e-19
C5orf34	54	200	3.94233	12.6308	3.20389	Up	9.9e-17	6.31e-16
SOD2	515	1906	59.7841	191.401	3.20153	Up	9.63e-146	5.92e-144
ATP8A2	10	37	0.369405	1.18235	3.20069	Up	0.000434958	0.000998644
LINC01572	10	37	1.07016	3.42526	3.20069	Up	0.000434958	0.000998277
B3GNT7	10	37	0.510136	1.63279	3.20069	Up	0.000434958	0.000998522
PCGF2	10	37	0.710155	2.27299	3.20069	Up	0.000434958	0.0009984
PI15	499	1843	13.7073	43.7943	3.19497	Up	1.21e-140	7.06e-139
RNF128	13	48	0.846484	2.7037	3.19404	Up	5.86e-05	0.000151968
RNLS	13	48	0.99504	3.17819	3.19404	Up	5.86e-05	0.000151947
PTGER3	52	192	1.23934	3.95851	3.19404	Up	4.59e-16	2.83e-15
MLF2	35	129	3.42815	10.9301	3.18833	Up	3.17e-11	1.46e-10
EN1	35	129	2.18513	6.96692	3.18833	Up	3.17e-11	1.46e-10
TTC23	44	162	2.08099	6.62787	3.18496	Up	9.87e-14	5.39e-13
SAMD12	292	1075	6.08839	19.3896	3.18469	Up	1.74e-82	5.26e-81
IDO1	75	276	7.18246	22.8646	3.18339	Up	2.28e-22	1.84e-21
FAT1	615	2262	7.70309	24.5089	3.1817	Up	2.57e-171	1.87e-169
MAGED2	111	408	9.34301	29.7075	3.17965	Up	2.76e-32	3.08e-31
NAMPT	369	1354	14.8957	47.2818	3.1742	Up	5.15e-103	1.97e-101
PDXK	154	565	3.85833	12.2453	3.17373	Up	5.46e-44	8.43e-43
GLO1	381	1397	34.4361	109.226	3.17186	Up	3.92e-106	1.57e-104
TBC1D24	65	238	1.8226	5.77295	3.16742	Up	2.2e-19	1.58e-18
CLTC	3051	11158	65.7044	207.865	3.16363	Up	0	0
EEF1E1	23	84	3.88781	12.2828	3.15932	Up	1.08e-07	3.75e-07
LRRC49	14	51	0.838659	2.64283	3.15126	Up	3.93e-05	0.000104337
LRRC66	14	51	0.777693	2.45071	3.15126	Up	3.93e-05	0.000104322
PXDN	240	873	6.48005	20.3903	3.14662	Up	2.34e-66	5.5e-65
SATB2	11	40	0.355003	1.11671	3.14564	Up	0.000289926	0.00068436
ARHGAP32	265	963	4.8467	15.2359	3.14356	Up	6.23e-73	1.65e-71
C15orf52	38	138	1.31915	4.14412	3.1415	Up	1e-11	4.79e-11
GULP1	38	138	1.89308	5.94713	3.1415	Up	1e-11	4.78e-11
WDR78	35	127	1.68375	5.28514	3.1389	Up	6.87e-11	3.11e-10
GLI3	162	587	3.64716	11.4319	3.13448	Up	5.74e-45	9.12e-44
PCDHGB6	25	90	1.00524	3.13051	3.11419	Up	4.96e-08	1.77e-07
LMNB2	94	338	3.74308	11.6429	3.1105	Up	2.48e-26	2.3e-25
CCNB2	56	201	6.68545	20.7578	3.10492	Up	3.16e-16	1.96e-15
F11R	247	886	9.45679	29.3442	3.10298	Up	3.46e-66	8.12e-65
CHKA	118	423	8.03131	24.905	3.10099	Up	1.93e-32	2.17e-31
IFIH1	462	1655	23.732	73.5413	3.09883	Up	7.32e-122	3.45e-120
GBP2	532	1903	23.8092	73.674	3.09435	Up	1.38e-139	7.98e-138
DUSP12	26	93	3.77397	11.6775	3.09422	Up	3.35e-08	1.22e-07
CCDC15	47	168	2.23258	6.90337	3.0921	Up	9.9e-14	5.4e-13
AGRN	21	75	0.525211	1.62262	3.08947	Up	7.6e-07	2.43e-06
GPRC5D	14	50	2.49416	7.70564	3.08947	Up	5.82e-05	0.000151025
HERC5	140	500	7.35913	22.7358	3.08947	Up	6.96e-38	9.34e-37
LOC284412	23	82	1.81453	5.59619	3.0841	Up	2.35e-07	7.91e-07
IFT140	55	196	1.93068	5.95177	3.08273	Up	9.93e-16	6.04e-15
RNF181	34	121	8.78132	27.0339	3.07857	Up	3.2e-10	1.38e-09
FBXL19-AS1	20	71	0.936089	2.87467	3.07093	Up	1.66e-06	5.14e-06
FECH	52	184	1.32125	4.04429	3.06095	Up	9.84e-15	5.68e-14
NEAT1	16386	57816	133.247	406.7	3.05223	Up	0	0
FAM184A	67	236	3.06302	9.33318	3.04705	Up	2.16e-18	1.48e-17
FURIN	45	158	1.91521	5.81706	3.03729	Up	9.78e-13	5.01e-12
SYTL2	177	621	7.61023	23.0971	3.03501	Up	1.22e-45	1.95e-44
PHKA1	79	277	2.37121	7.19225	3.03316	Up	3.26e-21	2.52e-20
MGST3	36	126	4.38556	13.2781	3.02768	Up	2.15e-10	9.38e-10
HERC6	207	722	9.84298	29.6985	3.01723	Up	2.11e-52	3.85e-51
SMOC1	23	80	1.15015	3.46066	3.00887	Up	5.05e-07	1.64e-06
NLN	173	601	3.69379	11.1005	3.00518	Up	1.11e-43	1.7e-42
BMP8B	19	66	0.931238	2.79829	3.00492	Up	5.32e-06	1.56e-05
RTN3	244	847	9.06783	27.2295	3.00286	Up	8.28e-61	1.76e-59
OCRL	124	429	4.44909	13.3152	2.9928	Up	1.75e-31	1.91e-30
CCDC127	46	159	5.99051	17.912	2.99007	Up	1.41e-12	7.14e-12
MRPS35	134	463	13.0627	39.0436	2.98895	Up	8.5e-34	9.91e-33
ACSL1	141	487	6.35339	18.9827	2.9878	Up	1.9e-35	2.36e-34
LCMT1	53	183	7.15401	21.3681	2.98688	Up	3.01e-14	1.69e-13
UNG	25	86	2.15228	6.40472	2.97578	Up	2.28e-07	7.7e-07
MEIS3P1	58	199	3.75547	11.1463	2.96802	Up	2.97e-15	1.76e-14
RHBDL2	14	48	1.37417	4.07564	2.96589	Up	0.000126138	0.000312924
GPC3	35	120	2.71377	8.04876	2.96589	Up	9.82e-10	4.06e-09
CENPE	300	1024	6.44186	19.0209	2.95271	Up	1.42e-71	3.66e-70
NCKAP1	313	1067	11.5416	34.0353	2.94891	Up	2.22e-74	6.01e-73
PKP4	503	1714	19.9009	58.6622	2.94771	Up	2.61e-118	1.18e-116
SULF1	404	1374	13.0702	38.453	2.94203	Up	5.74e-95	2.04e-93
C2orf15	15	51	1.97007	5.79433	2.94118	Up	8.39e-05	0.000213699
TNIP3	20	68	1.5102	4.44177	2.94118	Up	5.21e-06	1.53e-05
KSR2	30	102	0.326184	0.959363	2.94118	Up	2.16e-08	8e-08
MT2A	20	68	8.82694	25.9616	2.94118	Up	5.21e-06	1.53e-05
MPC2	53	180	4.0974	12.0378	2.93791	Up	9.17e-14	5.01e-13
BCL2L2	107	363	5.48874	16.1078	2.93471	Up	3.14e-26	2.9e-25
GSTM3	126	427	5.64586	16.5512	2.93156	Up	1.55e-30	1.65e-29
ELP2	268	907	17.5744	51.451	2.92762	Up	6.86e-63	1.51e-61
GDE1	190	643	11.9631	35.0222	2.92752	Up	4.44e-45	7.08e-44
ZNF112	47	159	2.32703	6.80993	2.92645	Up	2.9e-12	1.45e-11
CROT	128	433	7.12961	20.8634	2.92631	Up	7.16e-31	7.66e-30
LDHA	633	2138	50.784	148.379	2.92177	Up	2.21e-145	1.35e-143
NDC80	77	260	6.55579	19.1492	2.92095	Up	4.19e-19	2.96e-18
WNK3	48	162	0.782541	2.28467	2.91955	Up	1.96e-12	9.88e-12
NUF2	62	209	5.76436	16.8092	2.91606	Up	1.31e-15	7.9e-15
TC2N	1550	5221	54.9	159.969	2.91383	Up	0	0
NSMCE2	178	599	27.1589	79.0606	2.91104	Up	8.45e-42	1.25e-40
PSMA6	179	602	29.5022	85.8301	2.90928	Up	5.74e-42	8.54e-41
SOCS2	91	306	5.83904	16.9849	2.90885	Up	4.2e-22	3.37e-21
MORC4	166	556	8.00663	23.1984	2.8974	Up	1.12e-38	1.53e-37
STXBP5L	23	77	0.454165	1.31528	2.89604	Up	1.56e-06	4.85e-06
SYBU	23	77	1.31355	3.80408	2.89604	Up	1.56e-06	4.85e-06
COA4	69	231	15.637	45.2854	2.89604	Up	5.9e-17	3.8e-16
MRPL15	26	87	2.74902	7.95729	2.8946	Up	3.24e-07	1.07e-06
GABRE	29	97	1.7014	4.92291	2.89345	Up	6.77e-08	2.39e-07
HMMR	151	505	8.88437	25.703	2.89305	Up	3.28e-35	4.04e-34
FAR2P2	38	127	2.46134	7.11596	2.89109	Up	6.32e-10	2.65e-09
RPL26L1	24	80	6.25096	18.0247	2.88351	Up	1.05e-06	3.3e-06
FBLIM1	21	70	1.15957	3.34364	2.88351	Up	5.06e-06	1.49e-05
GRTP1	11	47	1.42051	4.09507	2.88282	Up	1.62e-05	4.5e-05
TLR5	58	193	2.51362	7.23553	2.87853	Up	2.7e-14	1.53e-13
RSF1	972	3232	35.011	100.705	2.87639	Up	3.71e-214	3.68e-212
TBC1D8B	103	342	3.33576	9.58133	2.87231	Up	3.96e-24	3.41e-23
CERS2	347	1146	25.2236	72.0615	2.85691	Up	1.92e-76	5.4e-75
ASPM	357	1179	6.06337	17.3221	2.85685	Up	1.37e-78	3.95e-77
TARS	294	970	18.2015	51.9484	2.85408	Up	6.89e-65	1.58e-63
IDH1	201	663	15.1097	43.1136	2.85338	Up	7.05e-45	1.12e-43
P4HA2	37	122	2.6613	7.59091	2.85233	Up	1.95e-09	7.9e-09
ARHGAP11B	14	46	2.54566	7.23557	2.84231	Up	0.000268962	0.000637929
LOC100506746	18	59	1.71138	4.85253	2.83545	Up	3.59e-05	9.57e-05
TBC1D16	84	275	1.41912	4.01896	2.83201	Up	2.42e-19	1.73e-18
LAPTM4B	121	396	9.99814	28.3055	2.83108	Up	3.59e-27	3.42e-26
CADPS2	136	445	4.14601	11.7353	2.8305	Up	2.49e-30	2.63e-29
PDZD2	122	399	1.93788	5.48253	2.82914	Up	2.43e-27	2.33e-26
CERS6	313	1023	8.44859	23.8868	2.82731	Up	1.85e-67	4.44e-66
FGD1	15	49	0.648857	1.83356	2.82584	Up	0.000178016	0.000432181
THNSL2	15	49	1.28123	3.62055	2.82584	Up	0.000178016	0.000432293
FAM86B1	15	49	1.13776	3.21513	2.82584	Up	0.000178016	0.000432237
NSDHL	19	62	2.15556	6.08471	2.8228	Up	2.39e-05	6.49e-05
SOX4	359	1168	13.6096	38.3034	2.81443	Up	2.76e-76	7.73e-75
LOC100505736	24	78	1.96728	5.53085	2.81142	Up	2.18e-06	6.68e-06
TEX15	16	52	0.292602	0.822626	2.81142	Up	0.000117948	0.000293734
SLC2A11	20	65	1.13311	3.18566	2.81142	Up	1.59e-05	4.42e-05
ILF2	474	1537	45.9885	128.999	2.80503	Up	2.41e-99	8.92e-98
GDPD1	25	81	1.40777	3.94564	2.80277	Up	1.46e-06	4.55e-06
CMAS	96	311	9.89561	27.7315	2.80241	Up	2.22e-21	1.73e-20
ZBP1	88	285	7.08152	19.8395	2.80159	Up	1.04e-19	7.53e-19
PVRL1	22	71	0.742397	2.07259	2.79176	Up	7.06e-06	2.04e-05
UQCR10	22	71	4.17265	11.649	2.79176	Up	7.06e-06	2.04e-05
RAD21	991	3198	48.8693	136.422	2.79156	Up	3.13e-203	2.77e-201
ZBTB8A	67	216	1.68159	4.68965	2.78882	Up	3.34e-15	1.98e-14
FMO5	90	290	6.32821	17.6392	2.78739	Up	6.77e-20	4.96e-19
GBP1	698	2248	42.3204	117.905	2.78601	Up	4.88e-143	2.9e-141
AMD1	547	1761	29.5512	82.2978	2.78493	Up	2.12e-112	8.89e-111
MLLT4	793	2552	18.9219	52.6763	2.78387	Up	6.11e-162	4.12e-160
PGRMC2	228	733	11.1247	30.9386	2.78106	Up	9.98e-48	1.68e-46
CHST3	56	180	1.48512	4.12942	2.78052	Up	7.44e-13	3.85e-12
IFITM1	80	257	20.6331	57.339	2.77898	Up	9.93e-18	6.62e-17
IQCK	85	273	4.51423	12.5421	2.77834	Up	9.79e-19	6.82e-18
PIK3R2	19	61	0.875109	2.43041	2.77727	Up	3.45e-05	9.21e-05
PLEKHA7	38	122	1.46155	4.05911	2.77727	Up	3.89e-09	1.53e-08
VCAN	672	2156	10.0088	27.7781	2.77537	Up	1.63e-136	9.04e-135
SEC61G	63	202	25.0005	69.3428	2.77366	Up	3.29e-14	1.85e-13
EPB41L1	97	311	2.8351	7.86319	2.77352	Up	4.37e-21	3.36e-20
ALMS1P	15	48	1.74238	4.82319	2.76816	Up	0.000257744	0.000612175
RCAN1	61	195	4.45513	12.3199	2.76533	Up	1.03e-13	5.64e-13
PTPN13	175	559	3.77309	10.4259	2.76322	Up	1.83e-36	2.35e-35
RRM2	165	527	8.88541	24.5497	2.76292	Up	1.82e-34	2.19e-33
NANS	94	300	14.0185	38.7022	2.7608	Up	2.87e-20	2.14e-19
CBWD3	21	67	2.25387	6.2205	2.75993	Up	1.53e-05	4.25e-05
CEP57L1	69	220	4.39689	12.1272	2.75814	Up	3.1e-15	1.84e-14
CEP70	156	496	10.4371	28.7065	2.75042	Up	2.5e-32	2.79e-31
CHI3L2	79	251	9.73935	26.7682	2.74845	Up	4.26e-17	2.76e-16
PLEKHB1	46	146	3.57417	9.81323	2.7456	Up	1.62e-10	7.15e-10
STEAP2	52	165	1.36728	3.75301	2.74488	Up	1.05e-11	5.02e-11
SLC9A3R1	168	532	15.4104	42.2141	2.73933	Up	2.31e-34	2.76e-33
PLA2G12A	195	616	6.8883	18.8235	2.73268	Up	2.15e-39	3.01e-38
H2AFY2	19	60	1.61247	4.40484	2.73174	Up	4.96e-05	0.000130097
SYTL4	53	167	2.50793	6.83593	2.72573	Up	1.01e-11	4.82e-11
ACACA	430	1354	7.45732	20.3131	2.72391	Up	3.92e-84	1.21e-82
MASTL	150	472	7.64993	20.8233	2.72203	Up	2.13e-30	2.25e-29
APOL1	124	390	7.60047	20.6788	2.72073	Up	2.26e-25	2.03e-24
MOK	28	88	2.51598	6.84027	2.71873	Up	8.96e-07	2.85e-06
ZBTB41	381	1197	8.31439	22.5965	2.71776	Up	2.42e-74	6.52e-73
FN1	2791	8761	58.6571	159.278	2.71541	Up	0	0
FCGR2C	73	229	5.42583	14.7238	2.71365	Up	1.85e-15	1.11e-14
HSPD1	652	2045	51.9477	140.946	2.71324	Up	2.14e-125	1.04e-123
MRGBP	38	119	4.29531	11.6359	2.70898	Up	1.13e-08	4.29e-08
NOL12	23	72	1.49763	4.05555	2.70799	Up	9.7e-06	2.76e-05
PEG3	55	172	1.16119	3.1413	2.70525	Up	6.49e-12	3.16e-11
MTCH2	118	369	8.3033	22.4614	2.70512	Up	6.75e-24	5.77e-23
PEX13	191	597	7.82293	21.1521	2.70385	Up	1.17e-37	1.56e-36
CECR2	16	50	0.306388	0.828254	2.70329	Up	0.000245356	0.000584604
BAG1	56	175	2.67453	7.23001	2.70329	Up	4.37e-12	2.15e-11
TMEM251	16	50	2.31698	6.26347	2.70329	Up	0.000245356	0.000584679
CHSY1	269	840	10.9329	29.5327	2.70128	Up	3.13e-52	5.68e-51
RHOBTB3	285	889	9.46882	25.5502	2.69835	Up	4.33e-55	8.34e-54
TMEM231	17	53	1.03821	2.79999	2.69693	Up	0.000162221	0.000397128
RPL19	1443	4496	364.543	982.542	2.69527	Up	1.28e-270	1.78e-268
NOP10	26	81	8.98698	24.2196	2.69497	Up	2.87e-06	8.66e-06
C10orf10	78	243	7.00199	18.8701	2.69497	Up	3.65e-16	2.26e-15
BAG3	61	190	4.39096	11.8311	2.69442	Up	6.03e-13	3.14e-12
TWF1	380	1183	20.4574	55.0927	2.69304	Up	1.62e-72	4.24e-71
ZNF239	81	252	6.27256	16.8812	2.69127	Up	1.12e-16	7.12e-16
DLGAP5	99	308	5.93629	15.9762	2.69127	Up	4.7e-20	3.47e-19
ATP1B3	105	326	10.4787	28.1435	2.68578	Up	4.45e-21	3.43e-20
SLC1A1	39	121	1.92887	5.17685	2.68388	Up	1.08e-08	4.1e-08
RANBP17	49	152	1.98018	5.31366	2.68343	Up	1.42e-10	6.27e-10
TNFSF10	730	2263	69.1217	185.361	2.68166	Up	3.61e-136	1.99e-134
TMC7	20	62	0.822434	2.20549	2.68166	Up	4.72e-05	0.000123986
LOC93622	20	62	2.21732	5.94609	2.68166	Up	4.72e-05	0.000123969
KCTD15	93	288	3.48702	9.34126	2.67887	Up	9.95e-19	6.93e-18
GAN	104	322	4.23242	11.3358	2.67833	Up	9.32e-21	7.08e-20
MAD2L1	94	291	12.1051	32.4171	2.67798	Up	6.71e-19	4.71e-18
PMAIP1	55	170	5.25353	14.0469	2.6738	Up	1.31e-11	6.21e-11
TMEM26	22	68	0.789202	2.11016	2.6738	Up	2.08e-05	5.69e-05
GOLPH3	443	1369	30.6134	81.8377	2.67326	Up	1e-82	3.04e-81
REEP5	791	2444	46.9432	125.47	2.6728	Up	3.54e-146	2.18e-144
YIPF6	506	1562	14.8952	39.7758	2.67038	Up	5.6e-94	1.96e-92
SERP1	621	1916	36.2037	96.627	2.66898	Up	9.17e-115	4e-113
TMED2	675	2080	58.713	156.508	2.66564	Up	3.44e-124	1.65e-122
USP54	103	317	3.09057	8.22817	2.66234	Up	2.76e-20	2.06e-19
SPDYA	28	86	2.85126	7.57563	2.65694	Up	1.82e-06	5.61e-06
TLCD2	56	172	1.75492	4.66271	2.65694	Up	1.24e-11	5.92e-11
FBXO5	142	436	11.6552	30.9572	2.65607	Up	3.12e-27	2.98e-26
SLMO2	256	786	18.4708	49.058	2.65598	Up	8.78e-48	1.48e-46
KIAA1958	57	175	1.37751	3.65847	2.65586	Up	8.36e-12	4.03e-11
PLEKHA5	115	353	3.22657	8.5676	2.65533	Up	2.47e-22	1.99e-21
GLUL	1012	3103	22.4635	59.5828	2.65243	Up	6.33e-183	4.9e-181
HMGCS1	550	1686	18.6621	49.4877	2.65178	Up	3.13e-100	1.17e-98
PHLPP1	46	141	1.32686	3.51827	2.65157	Up	9.38e-10	3.89e-09
GLIPR1L2	31	95	2.34177	6.20795	2.65096	Up	5.42e-07	1.76e-06
VWA2	32	98	1.01034	2.67662	2.64922	Up	3.62e-07	1.19e-06
ADAM9	358	1096	16.1549	42.7833	2.64831	Up	1.16e-65	2.7e-64
KIF5C	49	150	1.30228	3.4486	2.64812	Up	2.84e-10	1.23e-09
AUTS2	180	551	5.05334	13.3813	2.64802	Up	7.65e-34	8.94e-33
NEDD8	33	101	9.764	25.851	2.64758	Up	2.42e-07	8.13e-07
PVRL2	33	101	2.13673	5.65717	2.64758	Up	2.42e-07	8.13e-07
FNDC1	135	413	3.81084	10.0851	2.64642	Up	9.65e-26	8.77e-25
AOC2	17	52	1.17963	3.12135	2.64604	Up	0.00023223	0.000554882
ATP6V1C2	17	52	0.970282	2.5674	2.64604	Up	0.00023223	0.000554811
C3orf35	19	58	1.95089	5.1517	2.64068	Up	0.000101655	0.000254714
B3GALNT1	43	131	2.18395	5.75555	2.63539	Up	4.4e-09	1.72e-08
PTPRU	26	79	0.855217	2.24788	2.62843	Up	5.81e-06	1.69e-05
DNAJC25	53	161	3.91101	10.2773	2.6278	Up	8.17e-11	3.68e-10
ZNF185	27	82	1.12912	2.96641	2.62719	Up	3.87e-06	1.15e-05
NFATC4	55	167	1.78404	4.68599	2.62661	Up	3.69e-11	1.7e-10
PFN2	100	303	8.78083	23.0155	2.62111	Up	4.99e-19	3.51e-18
HSP90AB1	3608	10928	245.658	643.646	2.62009	Up	0	0
ZNF823	41	124	3.08333	8.06676	2.61625	Up	1.38e-08	5.19e-08
SCOC	84	254	7.77071	20.3262	2.61575	Up	3.83e-16	2.38e-15
CSE1L	552	1665	28.144	73.4349	2.60926	Up	1.38e-96	4.95e-95
OAS1	111	334	12.3431	32.1285	2.60295	Up	1.3e-20	9.82e-20
PLSCR1	213	640	17.823	46.3259	2.59922	Up	5.66e-38	7.63e-37
SLC26A2	328	985	7.51148	19.5133	2.59779	Up	1.75e-57	3.52e-56
PCDHB15	19	57	1.21787	3.16057	2.59515	Up	0.000144671	0.000355977
LGALS3	158	474	14.9376	38.7655	2.59515	Up	1.78e-28	1.77e-27
TMEM86A	50	150	2.53252	6.57227	2.59515	Up	5.36e-10	2.27e-09
PHYH	24	72	2.58786	6.7159	2.59515	Up	1.86e-05	5.13e-05
ADAL	39	117	1.6066	4.16939	2.59515	Up	4.34e-08	1.56e-07
WRB	39	117	4.5849	11.8985	2.59515	Up	4.34e-08	1.56e-07
YIPF1	55	165	5.34463	13.8701	2.59515	Up	7.33e-11	3.31e-10
SYAP1	192	575	10.0725	26.0942	2.59065	Up	4.11e-34	4.87e-33
TFDP1	138	413	9.62639	24.9216	2.58889	Up	6.35e-25	5.6e-24
SLC11A2	283	846	11.8295	30.5908	2.58598	Up	2.87e-49	4.93e-48
EIF2AK2	1679	5012	71.4587	184.526	2.58227	Up	3.68e-282	5.3e-280
SHCBP1	50	149	2.86083	7.37481	2.57785	Up	7.54e-10	3.15e-09
NDUFB10	48	143	12.7351	32.8201	2.57713	Up	1.67e-09	6.79e-09
F3	93	277	7.18678	18.5171	2.57655	Up	4.28e-17	2.77e-16
ZNF367	80	238	3.9962	10.2843	2.57353	Up	7.23e-15	4.21e-14
CCT3	339	1008	27.6286	71.066	2.57219	Up	6.86e-58	1.39e-56
EZH2	135	401	9.16812	23.5577	2.56952	Up	5.65e-24	4.84e-23
TIAM2	33	98	1.03153	2.64993	2.56894	Up	6.83e-07	2.2e-06
FADS2	66	196	3.63461	9.33709	2.56894	Up	1.84e-12	9.26e-12
ERLIN2	213	632	8.17027	20.9708	2.56673	Up	8.33e-37	1.08e-35
DYRK4	29	86	2.87704	7.38055	2.56533	Up	3.44e-06	1.03e-05
HPRT1	58	172	7.57994	19.445	2.56533	Up	4.39e-11	2.01e-10
VDAC1	405	1201	36.1111	92.634	2.56525	Up	2.4e-68	5.87e-67
PTMS	209	619	33.608	86.1051	2.56204	Up	5.56e-36	7.04e-35
TDRKH	102	302	6.63931	17.0048	2.56123	Up	2.42e-18	1.66e-17
PARP9	686	2031	18.6529	47.772	2.56111	Up	5.07e-114	2.18e-112
GOT2	148	438	11.1165	28.4592	2.56008	Up	6.74e-26	6.17e-25
KIAA1024	24	71	0.658289	1.68463	2.55911	Up	2.63e-05	7.12e-05
ZNF561-AS1	24	71	2.41995	6.19291	2.55911	Up	2.63e-05	7.12e-05
TRIM37	401	1186	16.4204	42.0114	2.55848	Up	3.1e-67	7.4e-66
H2AFJ	88	260	4.43778	11.3422	2.55583	Up	6.03e-16	3.7e-15
TPM1	350	1034	36.1988	92.5101	2.55561	Up	9.69e-59	1.99e-57
MCM4	237	700	8.917	22.783	2.555	Up	2.66e-40	3.79e-39
ACBD5	202	596	8.94938	22.8418	2.55233	Up	1.67e-34	2.02e-33
LMLN	114	336	2.94679	7.51322	2.54963	Up	4.22e-20	3.13e-19
FAM134B	93	274	5.23689	13.347	2.54865	Up	1.17e-16	7.45e-16
NPR3	54	159	1.34039	3.4141	2.5471	Up	3.02e-10	1.31e-09
ARL1	338	994	19.2855	49.0618	2.54397	Up	3.95e-56	7.77e-55
ADGRG6	165	485	4.38335	11.1457	2.54273	Up	3.27e-28	3.22e-27
RHOB	198	582	15.4298	39.2339	2.54273	Up	1.56e-33	1.8e-32
LARP1B	179	526	8.17724	20.7865	2.542	Up	1.89e-30	2e-29
LAS1L	129	379	9.58426	24.3585	2.54151	Up	2.27e-22	1.83e-21
ADRM1	32	94	3.99836	10.1602	2.54109	Up	1.44e-06	4.48e-06
PRDX4	64	188	12.8503	32.6538	2.54109	Up	7.96e-12	3.85e-11
EPHB4	47	138	1.99757	5.07371	2.53994	Up	4.91e-09	1.92e-08
L3MBTL1	31	91	1.70311	4.32477	2.53934	Up	2.16e-06	6.59e-06
INSIG1	228	669	14.0076	35.5546	2.53824	Up	3.39e-38	4.6e-37
BRIP1	143	419	3.23833	8.20806	2.53466	Up	1.82e-24	1.58e-23
ENTPD5	55	161	4.96623	12.5757	2.53224	Up	2.84e-10	1.23e-09
LTB4R	82	240	3.51502	8.89953	2.53186	Up	1.26e-14	7.21e-14
HYDIN	80	234	0.939537	2.37729	2.53028	Up	2.77e-14	1.56e-13
TANC2	210	614	3.30587	8.36137	2.52925	Up	5.37e-35	6.58e-34
HOMER1	65	190	2.78759	7.04873	2.52861	Up	7.48e-12	3.63e-11
SF3B6	231	674	55.4053	139.843	2.524	Up	3.94e-38	5.34e-37
NKX3-1	48	140	2.70538	6.82587	2.52307	Up	4.61e-09	1.81e-08
LDLRAD4-AS1	23	67	1.96365	4.94826	2.51993	Up	5.58e-05	0.000145144
C8orf4	65	189	6.5291	16.4227	2.5153	Up	1.04e-11	5e-11
RFC4	162	471	20.6605	51.9624	2.51506	Up	5.54e-27	5.25e-26
CSTF1	210	610	16.7172	42.0065	2.51277	Up	2.01e-34	2.41e-33
GTF3C6	73	212	14.21	35.6984	2.5122	Up	6.14e-13	3.19e-12
NRSN2-AS1	20	58	2.65315	6.65581	2.50865	Up	0.000191606	0.000463611
OAS2	638	1850	32.3503	81.1469	2.50838	Up	1.34e-100	5.04e-99
PTP4A1	618	1790	22.4569	56.2674	2.50557	Up	3.23e-97	1.16e-95
TFG	221	640	19.7146	49.3875	2.50513	Up	7.32e-36	9.25e-35
FLVCR2	19	55	0.961566	2.40785	2.5041	Up	0.000289632	0.000683752
LRGUK	19	55	1.30132	3.25863	2.5041	Up	0.000289632	0.000683838
SLC7A11	84	243	1.61004	4.02907	2.50247	Up	1.54e-14	8.84e-14
MECR	37	107	2.56647	6.42036	2.50164	Up	3.77e-07	1.24e-06
VSIG10	46	133	1.70028	4.25263	2.50113	Up	1.43e-08	5.37e-08
PRDX1	273	789	40.878	102.199	2.50009	Up	1.11e-43	1.7e-42
2018-09-04	27	78	2.05556	5.13692	2.49904	Up	1.53e-05	4.27e-05
LSM5	63	182	3.8873	9.7145	2.49904	Up	3.22e-11	1.49e-10
CHCHD2	116	335	26.3205	65.7542	2.49821	Up	1.96e-19	1.41e-18
MED1	1163	3353	26.3951	65.8292	2.494	Up	4.74e-179	3.62e-177
MAP3K13	372	1072	6.91723	17.2435	2.49284	Up	1.85e-58	3.79e-57
PNPT1	367	1057	14.7122	36.6545	2.49144	Up	1.3e-57	2.62e-56
NEIL3	25	72	1.92469	4.79508	2.49135	Up	3.46e-05	9.24e-05
CREM	41	118	2.79362	6.95518	2.48966	Up	1.06e-07	3.67e-07
MRPL9	49	141	5.36806	13.3623	2.48923	Up	6.03e-09	2.34e-08
CCT5	650	1869	32.7077	81.3557	2.48736	Up	3.24e-100	1.21e-98
E2F7	24	69	0.773068	1.92264	2.48702	Up	5.21e-05	0.000135888
HSPA5	2093	6017	97.4928	242.452	2.48687	Up	0	0
RND3	183	526	12.056	29.9764	2.48643	Up	2.07e-29	2.11e-28
UBE2H	520	1492	18.6322	46.2457	2.48203	Up	4.34e-80	1.28e-78
POLDIP2	61	175	4.12596	10.2394	2.48171	Up	9.9e-11	4.44e-10
ACADSB	437	1253	13.6024	33.7386	2.48034	Up	1.8e-67	4.32e-66
USP53	803	2296	22.5162	55.692	2.47342	Up	1.55e-121	7.27e-120
ARMC2	54	154	2.67289	6.59401	2.467	Up	1.6e-09	6.49e-09
STAT1	2387	6806	102.464	252.727	2.4665	Up	0	0
C14orf119	208	593	13.0609	32.2111	2.46623	Up	1.6e-32	1.8e-31
TMTC3	420	1197	10.7828	26.5838	2.4654	Up	6.78e-64	1.53e-62
LINC01590	20	57	2.37387	5.85253	2.4654	Up	0.000269418	0.00063893
EID3	20	57	2.51085	6.19025	2.4654	Up	0.000269418	0.000638849
PLCB4	138	393	4.54004	11.1845	2.46352	Up	4.79e-22	3.83e-21
MNAT1	151	430	20.1906	49.7373	2.46339	Up	5.65e-24	4.84e-23
CTSD	189	538	16.4629	40.5386	2.46242	Up	1.4e-29	1.44e-28
TMCO3	123	350	7.37061	18.143	2.46153	Up	8.93e-20	6.52e-19
AQP11	32	91	2.74853	6.76135	2.45999	Up	3.95e-06	1.18e-05
SHFM1	57	162	21.166	52.0381	2.45857	Up	6.73e-10	2.82e-09
ASAH1	369	1047	26.0646	63.9754	2.4545	Up	1.07e-55	2.08e-54
LOC100288637	67	190	2.15477	5.28593	2.45313	Up	2.46e-11	1.15e-10
APP	1582	4485	80.5258	197.485	2.45244	Up	3.79e-232	4.44e-230
GFPT1	716	2029	15.2138	37.2949	2.45138	Up	5.12e-106	2.04e-104
PPA1	265	750	37.6382	92.1481	2.44826	Up	3.27e-40	4.65e-39
CD46	665	1882	36.2436	88.7303	2.44816	Up	2.97e-98	1.08e-96
SPDYE8P	47	133	3.01368	7.37721	2.44791	Up	2.59e-08	9.52e-08
RFK	103	291	7.03628	17.1965	2.44398	Up	1.66e-16	1.04e-15
HSPB8	40	113	3.69479	9.02922	2.44377	Up	3.07e-07	1.02e-06
ME1	80	226	4.20641	10.2795	2.44377	Up	3.85e-13	2.03e-12
NANOS1	40	113	1.59865	3.90674	2.44377	Up	3.07e-07	1.02e-06
SNAPIN	28	79	4.92194	12.0129	2.44068	Up	2e-05	5.47e-05
CASP7	100	282	6.85413	16.7203	2.43945	Up	5.38e-16	3.31e-15
CGNL1	116	327	2.92291	7.12766	2.43855	Up	2.66e-18	1.81e-17
SAMD9	2286	6444	61.6684	150.378	2.43849	Up	0	0
DCAF6	330	930	16.8624	41.1084	2.43787	Up	4.16e-49	7.15e-48
UNC13B	88	248	2.55468	6.22799	2.43787	Up	3.15e-14	1.77e-13
FER1L4	27	76	0.743774	1.81106	2.43496	Up	3e-05	8.06e-05
ARV1	43	121	5.50294	13.3953	2.43421	Up	1.28e-07	4.42e-07
SPP1	214	602	21.8158	53.0879	2.43346	Up	2.81e-32	3.12e-31
SYNJ2	302	849	7.53876	18.3334	2.43188	Up	8.55e-45	1.35e-43
SRP9	676	1898	77.1659	187.421	2.4288	Up	9.61e-98	3.49e-96
TLR3	31	87	1.88512	4.57656	2.42773	Up	8.24e-06	2.37e-05
OR2A4	60	168	6.31141	15.2871	2.42214	Up	5.45e-10	2.3e-09
FANK1	20	56	2.85377	6.91224	2.42214	Up	0.000377332	0.000877413
PPIL6	25	70	1.0883	2.63602	2.42214	Up	6.77e-05	0.00017449
CD276	30	84	1.63121	3.95101	2.42214	Up	1.24e-05	3.48e-05
FBXO22	148	414	7.86008	19.0199	2.41981	Up	1.74e-22	1.42e-21
ZNF486	128	358	6.07398	14.6956	2.41944	Up	1.21e-19	8.75e-19
PDZK1	49	137	3.93969	9.52859	2.41861	Up	2.25e-08	8.3e-08
STMN1	327	914	27.0198	65.3314	2.41791	Up	1.25e-47	2.1e-46
MRPL3	316	881	33.127	79.8938	2.41174	Up	8.99e-46	1.45e-44
TTC26	33	92	1.40838	3.39653	2.41166	Up	5.11e-06	1.5e-05
KPNA2	207	577	19.333	46.6172	2.41128	Up	1.54e-30	1.64e-29
VAV3	585	1629	22.6842	54.6424	2.40884	Up	5.72e-83	1.74e-81
CDKN2B	46	128	2.13517	5.13957	2.4071	Up	7.42e-08	2.61e-07
ZNF607	109	303	4.61887	11.1069	2.40468	Up	1.08e-16	6.9e-16
NEO1	216	600	5.63539	13.5414	2.40292	Up	1.66e-31	1.8e-30
PCDHB14	49	136	2.28647	5.48973	2.40096	Up	3.11e-08	1.13e-07
TNKS1BP1	133	369	4.22593	10.1424	2.40003	Up	6.13e-20	4.51e-19
RNF103	260	720	13.7412	32.9173	2.39553	Up	2.75e-37	3.64e-36
HTATSF1	519	1437	31.7695	76.0925	2.39514	Up	1.1e-72	2.9e-71
FH	95	263	9.40965	22.5345	2.39483	Up	1.39e-14	7.94e-14
C8orf33	85	235	6.00633	14.3648	2.39161	Up	3.71e-13	1.96e-12
ZFP69B	76	210	6.91987	16.5404	2.39027	Up	6.76e-12	3.29e-11
NUP37	59	163	9.05439	21.639	2.38989	Up	1.54e-09	6.28e-09
GPR137C	25	69	1.18907	2.83896	2.38754	Up	9.42e-05	0.000236713
SPEF2	87	240	2.85357	6.80961	2.38635	Up	2.33e-13	1.25e-12
TRIM58	29	80	1.04011	2.48206	2.38635	Up	2.57e-05	6.97e-05
LRRC1	111	306	6.4549	15.3932	2.38474	Up	1.29e-16	8.14e-16
WASL	316	871	13.1406	31.3319	2.38437	Up	2.13e-44	3.33e-43
C14orf132	45	124	1.07182	2.55489	2.3837	Up	1.53e-07	5.23e-07
HELLS	384	1058	21.6036	51.4899	2.3834	Up	1.59e-53	2.96e-52
NEK5	32	88	2.0238	4.81439	2.37889	Up	1.06e-05	3e-05
PABPN1	32	88	1.90767	4.53813	2.37889	Up	1.06e-05	3e-05
FZD6	84	231	4.09319	9.73725	2.37889	Up	7.57e-13	3.92e-12
PSMA3	134	368	24.8295	58.9866	2.37566	Up	1.47e-19	1.06e-18
LLPH	59	162	8.96511	21.2942	2.37523	Up	2.12e-09	8.55e-09
CDK2AP1	137	376	15.4857	36.7655	2.37416	Up	6.27e-20	4.61e-19
HSBP1	159	436	14.7828	35.0661	2.37209	Up	7.85e-23	6.47e-22
C18orf21	46	126	7.54793	17.8847	2.36949	Up	1.41e-07	4.87e-07
PTGES3	1104	3023	69.4646	164.541	2.36871	Up	6.68e-148	4.14e-146
SMG5	156	427	6.3222	14.9697	2.3678	Up	2.53e-22	2.04e-21
SCD	312	854	10.5516	24.9842	2.3678	Up	4.83e-43	7.3e-42
DDX47	106	290	10.7881	25.5317	2.36665	Up	1.25e-15	7.56e-15
CPA3	34	93	3.73363	8.8344	2.36617	Up	6.54e-06	1.9e-05
SLC16A14	49	134	2.06032	4.874	2.36565	Up	5.91e-08	2.09e-07
DHX40	210	574	10.5902	25.0402	2.36447	Up	2.13e-29	2.18e-28
CCDC125	119	325	5.97826	14.1239	2.36254	Up	2.74e-17	1.79e-16
KCNMB3	63	172	5.47731	12.9359	2.36173	Up	8.27e-10	3.44e-09
CTBP2	225	614	8.75589	20.6694	2.36063	Up	3.02e-31	3.27e-30
ORC5	92	251	8.68899	20.5068	2.36009	Up	1.16e-13	6.33e-13
PTS	33	90	6.53373	15.4146	2.35923	Up	9.79e-06	2.78e-05
CTNND1	62	169	1.80556	4.25744	2.35796	Up	1.23e-09	5.03e-09
BUB1	129	351	6.56085	15.4426	2.35374	Up	1.95e-18	1.34e-17
RPS6KA6	50	136	1.1269	2.65153	2.35294	Up	5.46e-08	1.94e-07
DSCC1	32	87	2.60801	6.13367	2.35186	Up	1.46e-05	4.08e-05
ATP7B	46	125	1.28091	3.01101	2.35068	Up	1.95e-07	6.61e-07
LRP6	724	1967	13.2783	31.2069	2.35022	Up	1.47e-95	5.26e-94
RHEB	236	641	21.0324	49.4169	2.34957	Up	2.76e-32	3.07e-31
TMEM67	81	220	3.16946	7.44672	2.34952	Up	4.63e-12	2.27e-11
ANKRD26	508	1379	13.8577	32.5413	2.34824	Up	1.95e-67	4.67e-66
TUBA1C	118	320	11.2945	26.4959	2.3459	Up	7.58e-17	4.86e-16
YWHAQ	475	1288	38.9703	91.4109	2.34566	Up	5.57e-63	1.23e-61
DNAJC2	241	653	20.1477	47.2241	2.34389	Up	1.01e-32	1.14e-31
ALDH7A1	82	222	3.07208	7.19472	2.34197	Up	4.28e-12	2.11e-11
CHMP5	213	576	19.0284	44.5131	2.33929	Up	5.91e-29	5.97e-28
CATSPER2P1	27	73	3.0538	7.14235	2.33884	Up	8e-05	0.000204242
TOMM20	605	1635	33.0515	77.2672	2.33778	Up	5.52e-79	1.6e-77
PPP2R3A	299	808	8.11452	18.969	2.33766	Up	6.56e-40	9.28e-39
C1orf27	319	862	15.1414	35.3936	2.33754	Up	1.85e-42	2.76e-41
SMS	406	1097	40.8261	95.4247	2.33734	Up	1.46e-53	2.72e-52
HN1L	164	443	8.23448	19.2415	2.33669	Up	1.37e-22	1.12e-21
NARS2	100	270	7.34118	17.1463	2.33564	Up	2.44e-14	1.38e-13
RRM1	189	510	10.9529	25.567	2.33427	Up	1.01e-25	9.15e-25
SAP30	33	89	5.50271	12.8379	2.33302	Up	1.35e-05	3.79e-05
DNAAF2	59	159	3.68226	8.58423	2.33124	Up	5.5e-09	2.14e-08
HACD2	124	334	19.3181	45.0124	2.33006	Up	2.55e-17	1.67e-16
CAPS2	26	70	1.25209	2.9161	2.32898	Up	0.000120106	0.000298632
BPGM	42	113	3.6897	8.58741	2.3274	Up	9.56e-07	3.03e-06
SOWAHC	84	226	3.3377	7.76816	2.3274	Up	3.65e-12	1.81e-11
ERP27	102	274	12.0065	27.9004	2.32377	Up	2.09e-14	1.19e-13
MRPS17	51	137	16.1216	37.4628	2.32377	Up	6.92e-08	2.44e-07
ACSF2	35	94	2.78981	6.4815	2.32328	Up	8.31e-06	2.39e-05
GAB2	302	811	9.13281	21.2158	2.32304	Up	1.31e-39	1.85e-38
BRCA2	367	985	5.96058	13.8389	2.32173	Up	1.08e-47	1.81e-46
UCK2	117	314	4.39759	10.2094	2.32159	Up	2.85e-16	1.77e-15
LGALS3BP	82	220	6.70964	15.5722	2.32087	Up	8e-12	3.87e-11
NKAP	28	75	3.2668	7.56951	2.3171	Up	7.36e-05	0.000188663
KDELR3	62	166	6.63502	15.3674	2.31611	Up	3.16e-09	1.25e-08
MINPP1	43	115	2.74482	6.35017	2.31351	Up	8.81e-07	2.81e-06
SEC14L2	95	254	4.10175	9.48684	2.31287	Up	2.35e-13	1.26e-12
GFRA1	663	1772	12.8207	29.6419	2.31202	Up	9.62e-84	2.95e-82
RAD54B	85	227	2.92167	6.74962	2.3102	Up	4.6e-12	2.26e-11
NDUFA1	30	80	11.4151	26.3324	2.3068	Up	4.51e-05	0.000118768
GLA	24	64	3.12989	7.22004	2.3068	Up	0.000271024	0.000642576
SPDYE3	42	112	2.43856	5.62529	2.3068	Up	1.31e-06	4.1e-06
HOXC8	48	128	3.87953	8.94932	2.3068	Up	2.27e-07	7.65e-07
PLAUR	30	80	3.57227	8.24052	2.3068	Up	4.51e-05	0.000118751
TRIB1	235	626	11.9552	27.549	2.30435	Up	1.66e-30	1.76e-29
SNRPA1	110	293	19.2084	44.2596	2.30418	Up	4.35e-15	2.56e-14
TMEM181	428	1140	14.6651	33.79	2.30411	Up	3.57e-54	6.76e-53
TCAF1	344	916	11.1019	25.5727	2.30345	Up	7.63e-44	1.17e-42
GRPEL2	142	378	6.39689	14.7304	2.30274	Up	5.14e-19	3.62e-18
COPB2	724	1927	41.813	96.2712	2.30242	Up	3.27e-90	1.08e-88
ATP6V0E2	44	117	2.90492	6.68203	2.30025	Up	8.11e-07	2.59e-06
FAM177A1	272	723	15.4482	35.5214	2.29938	Up	7.58e-35	9.25e-34
TBCA	207	550	15.6434	35.9554	2.29845	Up	7.1e-27	6.7e-26
ZNF888	93	247	6.91514	15.8876	2.2975	Up	6.98e-13	3.62e-12
LNX1	23	61	1.36805	3.13867	2.29427	Up	0.00040754	0.00094414
NUCB2	539	1428	61.8326	141.71	2.29182	Up	9.41e-67	2.23e-65
RGS2	65	172	8.90376	20.3812	2.28906	Up	2.47e-09	9.87e-09
SNX24	79	209	6.83623	15.6451	2.28855	Up	4.8e-11	2.2e-10
FAM103A1	165	436	19.41	44.368	2.28583	Up	2.03e-21	1.58e-20
IER3IP1	95	251	11.6807	26.697	2.28556	Up	5.93e-13	3.09e-12
ADAMTSL3	72	190	1.81521	4.14371	2.28277	Up	4.01e-10	1.72e-09
PIGP	36	95	6.86317	15.6671	2.28277	Up	1.05e-05	2.97e-05
GNPNAT1	321	847	15.1122	34.4943	2.28255	Up	5.33e-40	7.57e-39
ATP5J	77	203	10.987	25.0569	2.28059	Up	1.05e-10	4.69e-10
ICK	220	580	6.52186	14.8737	2.28059	Up	7.32e-28	7.13e-27
DDX60L	1312	3458	35.7795	81.5769	2.27999	Up	1.92e-157	1.25e-155
WDR5	85	224	4.98211	11.3575	2.27967	Up	1.16e-11	5.54e-11
ZNF750	30	79	1.73856	3.96037	2.27797	Up	6.19e-05	0.000160176
STON2	408	1074	5.82979	13.2751	2.27712	Up	4.83e-50	8.41e-49
ITPRIPL2	301	792	7.2298	16.4561	2.27615	Up	2.56e-37	3.39e-36
YES1	286	752	11.2889	25.677	2.27454	Up	1.8e-35	2.24e-34
DIXDC1	105	276	3.2568	7.40548	2.27385	Up	5.61e-14	3.11e-13
CPD	704	1849	14.3964	32.7085	2.27199	Up	1.64e-84	5.09e-83
HSPB1	88	231	18.142	41.196	2.27076	Up	6.66e-12	3.24e-11
CEP89	56	147	3.87711	8.80399	2.27076	Up	4.56e-08	1.64e-07
CDK7	56	147	6.82647	15.5013	2.27076	Up	4.56e-08	1.64e-07
KIF2C	29	76	1.78879	4.05525	2.26703	Up	9.26e-05	0.000233772
ZNF33BP1	50	131	7.46867	16.9273	2.26644	Up	2.62e-07	8.76e-07
TLDC1	76	199	2.79353	6.32754	2.26507	Up	2.11e-10	9.21e-10
RMND1	157	411	14.4948	32.8244	2.26456	Up	6.03e-20	4.44e-19
RWDD1	170	445	18.6019	42.122	2.2644	Up	1.82e-21	1.43e-20
RARS	245	641	21.191	47.9608	2.26326	Up	3.35e-30	3.52e-29
ARHGEF10L	26	68	1.06988	2.42054	2.26244	Up	0.00022711	0.000543203
TP53INP2	39	102	1.7488	3.95656	2.26244	Up	5.91e-06	1.72e-05
YWHAH	291	761	30.0128	67.8954	2.26221	Up	1.61e-35	2.01e-34
SLC44A1	514	1344	9.03442	20.4352	2.26192	Up	2.08e-61	4.49e-60
FAM206A	57	149	5.5158	12.4727	2.26128	Up	4.19e-08	1.51e-07
PCCB	62	162	6.11157	13.814	2.2603	Up	1.09e-08	4.12e-08
CD274	62	162	3.1105	7.03065	2.2603	Up	1.09e-08	4.12e-08
IRS2	67	175	1.7705	4.00037	2.25946	Up	2.83e-09	1.13e-08
SCARB2	648	1692	25.1376	56.7795	2.25875	Up	1.22e-76	3.45e-75
PRKCI	300	783	11.359	25.6461	2.25778	Up	2.3e-36	2.94e-35
AP1S1	41	107	5.84572	13.1971	2.25757	Up	3.64e-06	1.09e-05
PRIM2	105	274	8.48277	19.1488	2.25737	Up	1.03e-13	5.62e-13
PDHX	128	334	7.92179	17.8814	2.25724	Up	2.14e-16	1.34e-15
DSN1	74	193	5.60606	12.6481	2.25615	Up	4.6e-10	1.95e-09
ZNF606	130	339	5.68998	12.8354	2.25579	Up	1.34e-16	8.45e-16
CCDC170	79	206	2.76529	6.23767	2.2557	Up	1.2e-10	5.36e-10
NFS1	76	198	5.606	12.6342	2.25369	Up	2.86e-10	1.24e-09
KDM5B	422	1099	12.2259	27.5428	2.25282	Up	3.75e-50	6.56e-49
AP1AR	164	427	10.429	23.4893	2.2523	Up	1.84e-20	1.38e-19
ARL5B	301	783	15.5091	34.8999	2.25028	Up	3.85e-36	4.88e-35
MRPL46	25	65	4.62311	10.398	2.24913	Up	0.000340552	0.000796336
ZNF229	30	78	1.02319	2.30129	2.24913	Up	8.47e-05	0.00021556
SLC4A8	117	304	1.83591	4.12648	2.24766	Up	6.07e-15	3.55e-14
SLC25A6	47	122	5.85677	13.1511	2.24545	Up	8.54e-07	2.72e-06
WDR35	143	371	3.80821	8.54673	2.24429	Up	7.3e-18	4.89e-17
CYB5R1	96	249	10.8051	24.2436	2.24373	Up	1.84e-12	9.27e-12
GPSM2	49	127	2.98757	6.69834	2.24207	Up	5.28e-07	1.72e-06
CDYL2	34	88	2.81317	6.29856	2.23896	Up	3.18e-05	8.5e-05
ZNF625	29	75	3.1639	7.07828	2.2372	Up	0.000126592	0.000314007
GHR	82	212	3.14994	7.04475	2.23647	Up	9.3e-11	4.17e-10
RFC2	53	137	5.30931	11.872	2.23608	Up	2.02e-07	6.82e-07
WARS	601	1553	38.5366	86.1415	2.23532	Up	4.21e-69	1.04e-67
TEX2	307	793	11.0839	24.7668	2.23448	Up	4.22e-36	5.34e-35
PRDX3	93	240	10.5704	23.5972	2.23239	Up	5.89e-12	2.87e-11
MED12L	50	129	0.885653	1.97663	2.23183	Up	4.83e-07	1.57e-06
TNFSF15	45	116	1.24407	2.77417	2.22991	Up	1.88e-06	5.79e-06
RNASEH2A	33	85	5.3437	11.9066	2.22816	Up	4.74e-05	0.000124354
NDUFAB1	40	103	11.0899	24.7029	2.22751	Up	7.36e-06	2.13e-05
TRIQK	87	224	4.20502	9.36567	2.22726	Up	3.3e-11	1.52e-10
IFITM3	188	484	52.0446	115.906	2.22705	Up	1.61e-22	1.31e-21
CDC42EP4	77	198	4.5918	10.2141	2.22442	Up	4.8e-10	2.04e-09
CELF3	28	72	0.924787	2.05711	2.22442	Up	0.000189248	0.000458437
ZNF676	51	131	3.21443	7.14245	2.222	Up	4.42e-07	1.45e-06
COX7A2	30	77	7.35773	16.3364	2.2203	Up	0.000115499	0.000287864
FAM114A1	113	290	5.04989	11.211	2.22004	Up	5.18e-14	2.88e-13
SLC35B1	46	118	5.28027	11.7172	2.21905	Up	1.72e-06	5.32e-06
APOL4	48	123	2.59923	5.7617	2.21669	Up	1.06e-06	3.34e-06
CNKSR3	48	123	2.7498	6.09548	2.21669	Up	1.06e-06	3.34e-06
ZNF702P	32	82	1.9745	4.37686	2.21669	Up	7.06e-05	0.000181491
CTDSPL	114	292	4.73207	10.4851	2.21575	Up	4.75e-14	2.64e-13
CUL2	212	543	9.17696	20.3331	2.21567	Up	7.79e-25	6.85e-24
SFXN2	41	105	2.95937	6.55611	2.21538	Up	6.72e-06	1.95e-05
UEVLD	118	302	8.99838	19.9219	2.21395	Up	1.85e-14	1.05e-13
PTK2	413	1057	16.6319	36.8221	2.21395	Up	1e-46	1.65e-45
NAA60	59	151	4.07414	9.01991	2.21395	Up	6.46e-08	2.28e-07
PPP4C	27	69	3.37362	7.45802	2.21069	Up	0.000283002	0.000668943
AGAP11	36	92	2.11007	4.66471	2.21069	Up	2.65e-05	7.17e-05
NDRG1	250	638	13.2924	29.3445	2.20761	Up	1.06e-28	1.06e-27
APLP2	1361	3471	66.0236	145.659	2.20617	Up	3.02e-148	1.88e-146
NNT-AS1	66	168	3.69401	8.13402	2.20195	Up	1.4e-08	5.27e-08
TMBIM4	101	257	9.32469	20.5252	2.20117	Up	2.16e-12	1.09e-11
MRPL18	79	201	14.9529	32.9107	2.20095	Up	5.42e-10	2.29e-09
LXN	68	173	11.2678	24.7981	2.20079	Up	8.69e-09	3.33e-08
CCDC149	35	89	1.59339	3.50498	2.1997	Up	3.94e-05	0.000104545
NAA20	98	249	15.4498	33.9576	2.19794	Up	5.11e-12	2.5e-11
CCT6A	506	1285	35.1245	77.1623	2.19682	Up	1.4e-55	2.73e-54
LSM3	154	391	40.976	89.997	2.19633	Up	5.1e-18	3.44e-17
WDHD1	119	302	3.64821	8.00906	2.19534	Up	3.06e-14	1.72e-13
SLC39A7	225	571	16.9552	37.2218	2.19531	Up	1.39e-25	1.26e-24
MCCC2	363	921	18.2759	40.112	2.1948	Up	3e-40	4.27e-39
ADGRA3	54	137	2.18654	4.79872	2.19467	Up	3.37e-07	1.11e-06
C1orf112	84	213	4.61898	10.1318	2.19352	Up	1.91e-10	8.41e-10
ZNF281	309	783	11.6854	25.6147	2.19202	Up	2.2e-34	2.64e-33
PFDN4	79	200	10.8537	23.7695	2.19	Up	7.3e-10	3.05e-09
HADH	49	124	4.4571	9.75709	2.18911	Up	1.31e-06	4.09e-06
PAICS	394	997	21.821	47.7655	2.18898	Up	3.32e-43	5.04e-42
FBXL20	769	1943	13.6988	29.9412	2.18569	Up	2.78e-82	8.38e-81
PLK1	44	111	3.65365	7.97331	2.18229	Up	5.1e-06	1.5e-05
TRAPPC3	46	116	5.4599	11.9104	2.18143	Up	3.14e-06	9.44e-06
SLC3A2	69	174	5.44359	11.8748	2.18143	Up	1.07e-08	4.05e-08
CDH23	73	184	1.21354	2.64602	2.1804	Up	4.11e-09	1.62e-08
OSBPL1A	252	635	11.0902	24.1743	2.17979	Up	6.88e-28	6.71e-27
AMPH	27	68	1.45737	3.1751	2.17865	Up	0.00038469	0.000893524
DDAH1	161	405	7.40986	16.1243	2.17606	Up	2.73e-18	1.86e-17
DNAJC1	138	347	12.2045	26.5468	2.17517	Up	7.16e-16	4.38e-15
PDCD5	43	108	13.1651	28.6037	2.17269	Up	7.56e-06	2.18e-05
NMI	237	595	29.6329	64.3554	2.17175	Up	4.79e-26	4.41e-25
PAAF1	98	246	10.8195	23.494	2.17146	Up	1.24e-11	5.89e-11
EIF2S2	492	1235	35.1014	76.2198	2.17142	Up	2.88e-52	5.24e-51
LGR4	106	266	3.73584	8.10973	2.17079	Up	1.85e-12	9.34e-12
ERMP1	448	1124	15.5113	33.6651	2.17035	Up	1.12e-47	1.88e-46
PTGFRN	126	316	3.69145	8.00859	2.16949	Up	1.63e-14	9.32e-14
DNA2	91	228	3.94378	8.54768	2.16738	Up	7.56e-11	3.41e-10
PSMD12	274	686	28.1966	61.0678	2.16579	Up	1.26e-29	1.31e-28
FBXO45	143	358	4.61262	9.98935	2.16565	Up	3.41e-16	2.11e-15
KDELR2	326	816	21.0788	45.6415	2.16528	Up	6.51e-35	7.96e-34
JUN	112	280	6.23278	13.4792	2.16263	Up	5.99e-13	3.12e-12
MTERF2	54	135	5.57872	12.0647	2.16263	Up	6.11e-07	1.98e-06
TMEM62	84	210	5.61186	12.1364	2.16263	Up	4.63e-10	1.97e-09
RAE1	44	110	4.43174	9.5842	2.16263	Up	6.88e-06	1.99e-05
S100A6	109	272	29.5121	63.7066	2.15866	Up	1.41e-12	7.16e-12
CDC42BPA	529	1320	9.31134	20.0989	2.15854	Up	4.43e-55	8.53e-54
CAMSAP2	388	968	9.71178	20.9597	2.15817	Up	7.77e-41	1.12e-39
CEP41	89	222	2.53751	5.47535	2.15777	Up	1.63e-10	7.19e-10
ARFIP1	146	364	8.35881	18.0275	2.1567	Up	2.59e-16	1.61e-15
DYNLL2	144	359	17.4961	37.7325	2.15662	Up	4.16e-16	2.57e-15
TRMT5	130	324	4.53931	9.78663	2.15597	Up	1.13e-14	6.52e-14
GAR1	116	289	16.9307	36.4886	2.15517	Up	3.11e-13	1.65e-12
ARL6IP1	762	1898	62.2404	134.108	2.15468	Up	3.96e-78	1.14e-76
PPP1R3B	157	391	5.08372	10.9522	2.15436	Up	2.24e-17	1.47e-16
THOC7	147	366	23.8246	51.3135	2.1538	Up	2.37e-16	1.48e-15
COPZ1	150	373	13.732	29.5388	2.15109	Up	1.35e-16	8.52e-16
KLF4	72	179	4.53957	9.76286	2.15061	Up	1.09e-08	4.12e-08
HMGN3-AS1	66	164	4.07785	8.76543	2.14952	Up	4.58e-08	1.64e-07
PCDHB13	31	77	1.6365	3.51631	2.14868	Up	0.000192979	0.000466692
CP	349	866	13.8435	29.7154	2.14652	Up	2.58e-36	3.31e-35
GPR160	160	397	14.6984	31.5488	2.14641	Up	1.7e-17	1.12e-16
CDC45	52	129	4.63872	9.95466	2.14599	Up	1.33e-06	4.16e-06
PRICKLE2	75	186	1.66659	3.57537	2.14533	Up	6.14e-09	2.38e-08
ZNF627	67	166	4.10398	8.79591	2.14326	Up	4.17e-08	1.5e-07
ADCY3	57	141	2.39779	5.13095	2.13986	Up	4.61e-07	1.51e-06
CDC20	36	89	3.97687	8.50493	2.1386	Up	6.53e-05	0.000168654
LRRCC1	136	336	6.49025	13.8709	2.13719	Up	6.53e-15	3.81e-14
SLC12A2	434	1072	11.5878	24.7599	2.13672	Up	3.86e-44	5.98e-43
LINC00893	32	79	2.52241	5.38685	2.1356	Up	0.000174998	0.000425129
ITGB4	77	190	2.40567	5.13501	2.13454	Up	5.09e-09	1.99e-08
IFT22	30	74	2.20849	4.71246	2.13379	Up	0.000287088	0.000678002
BLZF1	161	397	12.8553	27.4213	2.13308	Up	2.76e-17	1.8e-16
HSPA9	1205	2971	63.5578	135.558	2.13284	Up	1.07e-118	4.88e-117
RAPH1	640	1577	12.1598	25.9192	2.13154	Up	8.63e-64	1.93e-62
LOC100132077	67	165	5.73077	12.2086	2.13035	Up	5.57e-08	1.98e-07
MPHOSPH6	106	261	17.8038	37.9218	2.12999	Up	7.9e-12	3.82e-11
UCHL5	326	802	11.8021	25.1165	2.12813	Up	3.58e-33	4.11e-32
CALU	863	2123	25.8612	55.0339	2.12805	Up	5.89e-85	1.84e-83
C17orf75	37	91	1.49295	3.17634	2.12756	Up	5.93e-05	0.000153581
PRKAR2B	179	440	9.04164	19.226	2.12638	Up	7.04e-19	4.93e-18
SSBP1	297	730	54.0576	114.938	2.12622	Up	2.76e-30	2.9e-29
VKORC1L1	410	1007	12.8594	27.3217	2.12465	Up	4.35e-41	6.34e-40
HID1	33	81	1.826	3.87717	2.12331	Up	0.000158583	0.000388475
THRA	86	211	6.27852	13.3255	2.12239	Up	9.17e-10	3.8e-09
PAPSS2	172	421	8.24442	17.4564	2.11736	Up	5.6e-18	3.77e-17
ZKSCAN2	83	203	2.1539	4.55708	2.11573	Up	2.16e-09	8.71e-09
SMC4	1354	3308	45.7747	96.7418	2.11343	Up	2.04e-129	1.03e-127
CENPQ	34	83	3.63856	7.6837	2.11174	Up	0.000143618	0.000353572
PDIA3	877	2140	53.1037	112.094	2.11084	Up	3.59e-84	1.11e-82
E2F6	32	78	1.71524	3.61669	2.10856	Up	0.00023532	0.000561907
KIF18A	101	246	5.3934	11.3637	2.10696	Up	5.29e-11	2.42e-10
ZNF664	788	1919	33.7004	70.9946	2.10664	Up	2.38e-75	6.55e-74
DTNA	69	168	1.95402	4.11559	2.10621	Up	6.14e-08	2.17e-07
DOCK1	458	1115	12.3463	26.0008	2.10597	Up	1.73e-44	2.72e-43
ARFIP2	53	129	2.54836	5.36558	2.1055	Up	2.16e-06	6.62e-06
FGF13	60	146	4.14474	8.7245	2.10496	Up	4.62e-07	1.51e-06
MAP1B	984	2394	15.1904	31.9698	2.10461	Up	2.37e-93	8.19e-92
CSNK1A1	554	1347	38.7327	81.4663	2.10329	Up	3.04e-53	5.63e-52
SDC2	244	593	12.9474	27.22	2.10236	Up	2.43e-24	2.1e-23
DNAL1	172	418	3.71143	7.80246	2.10228	Up	1.31e-17	8.68e-17
MEGF9	235	571	6.99794	14.7089	2.10189	Up	1.74e-23	1.47e-22
RPS27L	70	170	11.9416	25.0874	2.10084	Up	5.58e-08	1.98e-07
FAAH2	49	119	4.50362	9.46139	2.10084	Up	5.7e-06	1.66e-05
NOCT	56	136	5.21964	10.9656	2.10084	Up	1.21e-06	3.8e-06
ADCY6	105	255	3.18208	6.68504	2.10084	Up	2.72e-11	1.26e-10
ACAT2	49	119	5.25902	11.0484	2.10084	Up	5.7e-06	1.66e-05
SNRPF	199	483	46.406	97.4339	2.0996	Up	4.63e-20	3.43e-19
HAPLN3	40	97	3.48585	7.31244	2.09775	Up	4.41e-05	0.000116116
SH3RF1	99	240	3.47721	7.29204	2.09709	Up	1.13e-10	5.04e-10
RAD18	132	320	4.25336	8.91969	2.09709	Up	9.26e-14	5.06e-13
CUEDC1	33	80	1.55438	3.25969	2.09709	Up	0.000212852	0.000510534
RIPK2	52	126	3.71995	7.79733	2.09609	Up	3.18e-06	9.56e-06
ALDH18A1	199	482	10.6266	22.2654	2.09525	Up	6.13e-20	4.51e-19
ZNF485	50	121	4.49937	9.4191	2.09342	Up	5.16e-06	1.52e-05
ENOPH1	124	300	10.4658	21.9036	2.09287	Up	6.13e-13	3.19e-12
LIMCH1	177	428	5.30496	11.0967	2.09176	Up	8.15e-18	5.45e-17
MKI67	1357	3280	20.0834	41.9927	2.09091	Up	2.04e-125	9.92e-124
TOR1AIP2	715	1728	15.8709	33.1805	2.09064	Up	6.18e-67	1.47e-65
VDAC2	178	430	16.9237	35.3659	2.08973	Up	7.41e-18	4.96e-17
SLC39A1	77	186	5.78828	12.0952	2.08961	Up	1.6e-08	5.98e-08
GMDS	130	314	14.1413	29.5472	2.08943	Up	1.97e-13	1.06e-12
PIGC	53	128	6.53399	13.6507	2.08918	Up	2.88e-06	8.7e-06
ZMPSTE24	374	903	21.852	45.6405	2.08861	Up	9.96e-36	1.25e-34
RAB11FIP1	628	1516	14.7826	30.8698	2.08825	Up	8.47e-59	1.74e-57
MRAS	87	210	3.50587	7.32044	2.08806	Up	1.96e-09	7.92e-09
STK32B	46	111	2.34987	4.90513	2.08741	Up	1.36e-05	3.83e-05
TPM3	2101	5068	54.7297	114.202	2.08666	Up	7.5e-192	6.03e-190
PTPN14	341	822	4.69086	9.78164	2.08526	Up	1.46e-32	1.65e-31
THBS3	39	94	2.23352	4.65689	2.085	Up	6.51e-05	0.000168062
BCAP31	105	253	10.6453	22.1887	2.08436	Up	4.78e-11	2.19e-10
MIPEP	44	106	3.3498	6.98095	2.08399	Up	2.22e-05	6.05e-05
BHLHE40	224	539	13.6529	28.419	2.08153	Up	8.08e-22	6.41e-21
C1orf131	64	154	8.19609	17.0604	2.08153	Up	3.13e-07	1.04e-06
SRD5A1	64	154	5.22754	10.8813	2.08153	Up	3.13e-07	1.04e-06
FAM120C	143	344	3.31339	6.89505	2.08096	Up	1.85e-14	1.05e-13
SGOL2	116	279	4.72286	9.82637	2.0806	Up	5.39e-12	2.63e-11
ARF4	242	582	25.7194	53.5069	2.08041	Up	2.07e-23	1.75e-22
KIAA1671	346	832	6.09718	12.6829	2.08012	Up	9.1e-33	1.03e-31
NUDT9	141	339	9.25935	19.2576	2.0798	Up	2.96e-14	1.67e-13
FLJ42393	52	125	4.24363	8.82442	2.07945	Up	4.24e-06	1.26e-05
ACTN4	659	1584	30.8207	64.0847	2.07927	Up	8.61e-61	1.83e-59
IL13RA1	484	1163	22.3423	46.4413	2.07863	Up	4.56e-45	7.26e-44
RAB3IP	422	1013	8.0902	16.7996	2.07653	Up	2.17e-39	3.04e-38
NAE1	158	379	15.2894	31.7259	2.07503	Up	1.08e-15	6.56e-15
ZNF117	620	1487	17.9034	37.1446	2.07473	Up	6.59e-57	1.31e-55
SCP2	166	398	11.2651	23.3643	2.07404	Up	2.18e-16	1.36e-15
TAX1BP1	1154	2766	61.1469	126.783	2.07343	Up	3.83e-104	1.49e-102
USP46	96	230	2.18307	4.52446	2.07252	Up	4.66e-10	1.98e-09
TSPYL5	76	182	3.14906	6.5235	2.07157	Up	3.11e-08	1.13e-07
SHISA2	33	79	2.11232	4.37437	2.07088	Up	0.000284768	0.000672863
WDYHV1	41	98	4.75951	9.84116	2.06768	Up	5.32e-05	0.00013859
SLC38A1	3647	8717	78.3479	161.995	2.06763	Up	0	0
CCNC	213	509	17.0736	35.2944	2.06719	Up	2.13e-20	1.59e-19
KIF13A	304	726	7.93577	16.3943	2.06588	Up	2.19e-28	2.17e-27
FAM20B	610	1456	18.9714	39.1717	2.06478	Up	3.52e-55	6.79e-54
STAU1	474	1131	23.7932	49.111	2.06408	Up	3.22e-43	4.9e-42
LSM1	99	236	15.7687	32.5174	2.06214	Up	3.48e-10	1.5e-09
ZNF131	271	646	15.6315	32.2333	2.06208	Up	2.46e-25	2.21e-24
PDSS1	34	81	3.88592	8.00834	2.06086	Up	0.000257004	0.000610649
NT5DC3	102	243	2.61468	5.38848	2.06086	Up	1.96e-10	8.6e-10
MPC1	105	250	16.1137	33.1886	2.05965	Up	1.11e-10	4.95e-10
ISCA1	101	240	9.32935	19.1771	2.05557	Up	2.86e-10	1.24e-09
SERAC1	56	133	2.60916	5.36052	2.0545	Up	2.84e-06	8.59e-06
PPME1	56	133	3.7589	7.72264	2.0545	Up	2.84e-06	8.59e-06
ATP6V1D	128	304	13.1065	26.9272	2.0545	Up	1.27e-12	6.47e-12
RYR3	48	114	0.569948	1.17096	2.0545	Up	1.48e-05	4.13e-05
PGAP1	211	501	3.51112	7.21178	2.05398	Up	7.77e-20	5.69e-19
AZI2	148	351	7.90092	16.2093	2.05157	Up	2.61e-14	1.48e-13
ATRIP	38	90	2.64178	5.41249	2.04881	Up	0.000127945	0.00031728
NPAS2	38	90	1.75503	3.59571	2.04881	Up	0.000127945	0.000317238
SLC5A6	57	135	3.15873	6.47163	2.04881	Up	2.57e-06	7.8e-06
CHPT1	125	296	14.7515	30.2175	2.04844	Up	2.96e-12	1.47e-11
RUVBL1	60	142	6.27571	12.8482	2.04729	Up	1.44e-06	4.48e-06
GOLT1B	204	482	11.5295	23.5651	2.0439	Up	6.04e-19	4.24e-18
BPNT1	69	163	5.17638	10.5781	2.04353	Up	2.52e-07	8.46e-07
TMEM97	58	137	4.17664	8.53417	2.04331	Up	2.33e-06	7.07e-06
PSMD14	128	302	13.7859	28.1367	2.04098	Up	2.21e-12	1.11e-11
RNFT1	173	408	15.869	32.3747	2.04012	Up	3.32e-16	2.06e-15
ZCRB1	149	351	14.9424	30.4496	2.03781	Up	4.1e-14	2.29e-13
PYGB	169	398	7.56529	15.4122	2.03722	Up	8.49e-16	5.18e-15
UBXN2A	136	320	13.2856	27.0418	2.03542	Up	5.79e-13	3.02e-12
USP14	452	1063	20.1121	40.9161	2.0344	Up	1.86e-39	2.62e-38
C11orf24	57	134	5.0146	10.1978	2.03363	Up	3.4e-06	1.02e-05
HAT1	129	303	14.2846	29.0243	2.03187	Up	2.63e-12	1.31e-11
ASPH	586	1376	20.259	41.1511	2.03125	Up	2.14e-50	3.76e-49
CCDC14	877	2059	38.1687	77.5185	2.03095	Up	1.68e-74	4.56e-73
UHRF1	147	345	6.31009	12.8109	2.03022	Up	8.62e-14	4.72e-13
DNAJB11	150	352	16.4037	33.2993	2.02999	Up	4.88e-14	2.72e-13
ZHX1	329	772	11.6978	23.7447	2.02985	Up	5.77e-29	5.84e-28
PPP1CB	1648	3867	61.1222	124.067	2.02983	Up	4.32e-138	2.46e-136
PHB	55	129	5.2078	10.5663	2.02894	Up	5.51e-06	1.61e-05
PDIA4	307	720	19.2316	39.0168	2.02879	Up	4.32e-27	4.11e-26
GPD2	268	628	8.22022	16.6629	2.02706	Up	8.66e-24	7.38e-23
PFKFB2	94	220	2.45764	4.97571	2.02459	Up	2.99e-09	1.19e-08
SNRPD1	638	1493	72.4703	146.704	2.02433	Up	4.07e-54	7.7e-53
GSS	50	117	4.86643	9.85073	2.02422	Up	1.6e-05	4.45e-05
H2AFZ	118	276	23.0423	46.6224	2.02334	Up	3.06e-11	1.42e-10
TPI1	130	304	15.0817	30.5085	2.02289	Up	3.12e-12	1.55e-11
CCDC6	1006	2352	31.9317	64.5807	2.02247	Up	4.86e-84	1.49e-82
RAB2A	367	858	17.8036	36.0056	2.02238	Up	9.43e-32	1.03e-30
EXD2	80	187	2.80135	5.6645	2.02206	Up	4.8e-08	1.72e-07
KIAA0196	392	916	17.4046	35.1817	2.0214	Up	9.46e-34	1.1e-32
ZNF146	632	1476	30.3092	61.233	2.02028	Up	2.8e-53	5.19e-52
CANX	3171	7400	118.464	239.146	2.01873	Up	4.17e-259	5.54e-257
NCAPH	69	161	2.10592	4.2507	2.01845	Up	4.39e-07	1.44e-06
EBNA1BP2	126	294	15.4923	31.2705	2.01845	Up	8.01e-12	3.87e-11
TPMT	88	205	4.97808	10.0317	2.01518	Up	1.24e-08	4.67e-08
PEBP1	450	1048	55.8122	112.44	2.01461	Up	4.36e-38	5.9e-37
ZNF689	64	149	3.33009	6.70664	2.01395	Up	1.26e-06	3.96e-06
TMCO1	550	1280	21.7791	43.8459	2.01321	Up	4.53e-46	7.34e-45
DNAJB6	483	1124	36.0737	72.6192	2.01308	Up	1.17e-40	1.68e-39
PSMB4	205	477	40.9832	82.4922	2.01283	Up	3.65e-18	2.47e-17
ZNF788	49	114	2.40416	4.83854	2.01257	Up	2.35e-05	6.38e-05
CTNNA1	739	1719	35.459	71.351	2.01221	Up	3.35e-61	7.19e-60
IFT74	138	321	11.7547	23.6527	2.01219	Up	1.07e-12	5.49e-12
C1orf43	175	407	16.9967	34.1951	2.01186	Up	1.06e-15	6.41e-15
ZW10	93	216	5.83377	11.7209	2.00915	Up	5.7e-09	2.22e-08
FUCA2	109	253	7.91081	15.8839	2.00787	Up	2.93e-10	1.27e-09
OLFM1	100	232	6.43439	12.9133	2.00692	Up	1.64e-09	6.64e-09
TBL2	85	197	5.17398	10.3732	2.00488	Up	2.9e-08	1.06e-07
POP4	79	183	5.63185	11.2854	2.00385	Up	9.18e-08	3.2e-07
KIFC1	57	132	3.89818	7.80914	2.00328	Up	5.91e-06	1.72e-05
CLHC1	83	192	2.87107	5.74524	2.00108	Up	4.66e-08	1.67e-07
SNORD17	488	13	380.772	8.77467	0.0230444	Down	7.67e-142	4.5e-140
LRRC55	219	6	7.49	0.177513	0.0237	Down	3.33e-64	7.56e-63
SDK2	285	12	4.91545	0.179036	0.0364232	Down	3.61e-78	1.04e-76
CNR2	173	8	18.0236	0.720987	0.0400024	Down	3.2e-47	5.32e-46
TIE1	121	6	5.61925	0.241038	0.0428951	Down	5.3e-33	6.06e-32
MARCO	261	13	26.3026	1.1333	0.0430869	Down	1.5e-69	3.77e-68
FABP4	336	17	74.1463	3.2452	0.0437675	Down	7.79e-89	2.52e-87
NPIPB3	117	6	5.97684	0.265142	0.0443616	Down	9.45e-32	1.04e-30
MAST3	196	11	6.15055	0.298602	0.0485488	Down	2.49e-51	4.44e-50
GRAP	238	14	21.6488	1.10161	0.0508854	Down	2.17e-61	4.67e-60
NCF1C	118	7	15.1325	0.776549	0.0513166	Down	4.47e-31	4.82e-30
FCHO1	130	8	7.45431	0.396822	0.0532339	Down	7.95e-34	9.27e-33
RGS19	145	9	16.843	0.904348	0.0536929	Down	1.68e-37	2.24e-36
SCN3A	161	10	3.26277	0.175309	0.0537299	Down	1.76e-41	2.6e-40
WAS	142	9	14.3493	0.786733	0.0548272	Down	1.41e-36	1.82e-35
KCNQ5	125	8	3.48178	0.192763	0.0553633	Down	2.75e-32	3.06e-31
FCAMR	124	8	8.23953	0.459846	0.0558098	Down	5.57e-32	6.15e-31
ZIK1	89	6	6.15032	0.358675	0.0583181	Down	4.37e-23	3.63e-22
BMP4	89	6	8.47927	0.494495	0.0583181	Down	4.37e-23	3.63e-22
ABCA8	189	13	5.82123	0.346369	0.0595009	Down	2.8e-47	4.67e-46
KCNH8	85	6	3.1046	0.189574	0.0610625	Down	7.29e-22	5.79e-21
KLHL4	98	7	3.09523	0.191252	0.0617894	Down	6.15e-25	5.43e-24
PDLIM2	82	6	3.29075	0.208293	0.0632965	Down	5.97e-21	4.57e-20
PTPRCAP	109	8	22.2235	1.41097	0.06349	Down	2.12e-27	2.03e-26
FCRL2	339	25	24.2137	1.5447	0.0637944	Down	4.2e-82	1.26e-80
ACSF3	121	9	5.88219	0.378476	0.0643427	Down	3.64e-30	3.82e-29
ARHGEF15	91	7	4.00288	0.266361	0.0665424	Down	8.17e-23	6.72e-22
BLK	370	29	26.4178	1.79116	0.0678013	Down	5.74e-88	1.85e-86
RASSF9	152	12	15.6506	1.06884	0.0682935	Down	6.11e-37	8e-36
HIST1H2AG	88	7	32.6774	2.24856	0.0688109	Down	6.57e-22	5.23e-21
TIMD4	544	44	73.4834	5.14145	0.0699674	Down	2.13e-127	1.06e-125
MAP4K1	299	25	19.663	1.4222	0.0723287	Down	4.64e-70	1.17e-68
ITGB2-AS1	127	11	9.80601	0.734722	0.0749257	Down	2.79e-30	2.93e-29
FGR	103	9	7.66487	0.579365	0.075587	Down	9.43e-25	8.25e-24
ATHL1	80	7	4.52691	0.342651	0.075692	Down	1.65e-19	1.18e-18
RGS14	67	6	5.1496	0.398925	0.0774673	Down	1.95e-16	1.22e-15
LMOD1	121	11	5.64049	0.443574	0.078641	Down	1.7e-28	1.69e-27
MYH11	766	70	20.4051	1.61306	0.0790517	Down	5.04e-172	3.69e-170
SH2D3C	256	24	15.0097	1.21727	0.0810986	Down	4.27e-58	8.66e-57
GYPC	117	11	10.4674	0.851311	0.0813296	Down	2.59e-27	2.48e-26
SNX20	116	11	6.4925	0.532585	0.0820307	Down	5.12e-27	4.86e-26
C10orf128	158	15	14.2527	1.17051	0.0821251	Down	2.81e-36	3.59e-35
ARRDC5	63	6	7.11247	0.585967	0.0823859	Down	3e-15	1.78e-14
DUSP1	83	8	7.58336	0.632289	0.0833785	Down	1.3e-19	9.41e-19
PLEKHO2	228	22	11.331	0.945799	0.0834699	Down	2.03e-51	3.63e-50
FXYD6	72	7	5.97333	0.50237	0.0841022	Down	3.88e-17	2.52e-16
LOC101928324	82	8	19.3663	1.63442	0.0843953	Down	2.56e-19	1.83e-18
TFEB	90	9	7.07017	0.611606	0.0865052	Down	6.61e-21	5.05e-20
P2RX5-TAX1BP3	120	12	3.53077	0.30543	0.0865052	Down	2.01e-27	1.93e-26
TRPV2	79	8	5.20264	0.455752	0.0876002	Down	1.95e-18	1.34e-17
PLCXD3	108	11	2.58067	0.227376	0.0881071	Down	1.15e-24	1e-23
CORO1A	650	69	62.1835	5.71022	0.0918285	Down	8.32e-139	4.75e-137
FAM129C	436	47	32.1479	2.99783	0.093251	Down	3.88e-93	1.33e-91
NIPAL4	102	11	5.75245	0.536645	0.0932899	Down	6.42e-23	5.3e-22
2018-09-01	241	26	27.9942	2.61256	0.0933251	Down	3.5e-52	6.34e-51
CLEC17A	129	14	10.7215	1.00655	0.0938816	Down	1.49e-28	1.49e-27
FCRLA	346	38	27.0774	2.5725	0.0950057	Down	9.78e-74	2.61e-72
CRTC1	91	10	2.40677	0.228789	0.0950606	Down	1.86e-20	1.39e-19
RASGRP2	479	53	38.3458	3.67029	0.0957155	Down	3.72e-101	1.4e-99
GNG7	90	10	3.91973	0.376752	0.0961168	Down	3.61e-20	2.68e-19
SEMA6D	63	7	1.91019	0.183601	0.0961168	Down	1.65e-14	9.44e-14
JAK3	318	36	10.8218	1.05979	0.0979304	Down	4.04e-67	9.59e-66
F13A1	254	29	12.1591	1.20091	0.0987657	Down	9.38e-54	1.75e-52
ANKRD44-IT1	260	30	44.9769	4.48931	0.0998136	Down	9.2e-55	1.76e-53
HSPB6	78	9	9.87952	0.986111	0.0998136	Down	2.03e-17	1.33e-16
FCER2	508	59	58.0244	5.82963	0.100469	Down	3.61e-105	1.42e-103
BIN1	223	26	15.4508	1.55833	0.100858	Down	5.34e-47	8.82e-46
LINC00494	137	16	7.05307	0.712557	0.101028	Down	2e-29	2.05e-28
IGSF10	516	62	11.133	1.15717	0.10394	Down	2.43e-105	9.61e-104
C12orf42	83	10	7.19921	0.750324	0.104223	Down	3.71e-18	2.52e-17
ART4	91	11	12.2743	1.28349	0.104567	Down	9.42e-20	6.85e-19
CD22	1661	201	93.3048	9.76725	0.104681	Down	0	0
STAB2	1933	234	43.4336	4.54833	0.104719	Down	0	0
PCDH15	288	35	5.75764	0.605288	0.105128	Down	3e-59	6.26e-58
LIMS2	49	6	3.86904	0.409827	0.105925	Down	3.56e-11	1.64e-10
UNC119	57	7	6.38442	0.678246	0.106234	Down	8.78e-13	4.51e-12
TAS2R31	57	7	10.3239	1.09675	0.106234	Down	8.78e-13	4.51e-12
MUC6	65	8	1.50195	0.159909	0.106468	Down	2.18e-14	1.24e-13
CCR7	281	35	21.3491	2.30029	0.107747	Down	2.91e-57	5.81e-56
TEF	48	6	2.01919	0.218338	0.108131	Down	6.87e-11	3.11e-10
CADM3	72	9	3.60047	0.389324	0.108131	Down	1.05e-15	6.4e-15
LOC642361	48	6	5.21832	0.564265	0.108131	Down	6.87e-11	3.11e-10
RAB39B	104	13	5.47612	0.592141	0.108131	Down	4.36e-22	3.5e-21
TECPR1	136	17	4.37767	0.473364	0.108131	Down	1.89e-28	1.88e-27
FGD2	279	35	16.9438	1.83872	0.108519	Down	1.07e-56	2.12e-55
GPSM3	71	9	8.8415	0.969509	0.109654	Down	2.03e-15	1.21e-14
ARAP3	71	9	2.49518	0.273607	0.109654	Down	2.03e-15	1.21e-14
FLT4	110	14	3.47305	0.382374	0.110097	Down	4.11e-23	3.42e-22
PARVG	345	44	18.1092	1.99791	0.110325	Down	3.06e-69	7.62e-68
G0S2	47	6	9.02538	0.996692	0.110432	Down	1.32e-10	5.87e-10
ROBO4	70	9	3.37365	0.375221	0.111221	Down	3.89e-15	2.3e-14
ADGRA2	116	15	3.55506	0.397669	0.11186	Down	3.86e-24	3.33e-23
LTB	153	20	31.6836	3.58273	0.113079	Down	3.08e-31	3.33e-30
ITGA8	565	74	15.001	1.6996	0.113299	Down	5.09e-111	2.12e-109
TLR9	61	8	2.91483	0.330685	0.113449	Down	2.98e-13	1.58e-12
TNFSF11	425	56	33.3162	3.79748	0.113983	Down	1.03e-83	3.17e-82
PAX5	1385	183	28.7485	3.28593	0.114299	Down	1.98e-268	2.71e-266
CD209	551	73	23.0215	2.63844	0.114608	Down	9.26e-108	3.76e-106
SIGLEC1	264	35	7.26488	0.833172	0.114685	Down	1.78e-52	3.26e-51
MEF2C-AS1	113	15	11.733	1.3473	0.11483	Down	2.7e-23	2.26e-22
MIR99AHG	46	6	2.44792	0.281884	0.115152	Down	2.54e-10	1.11e-09
GGA1	60	8	3.46084	0.399174	0.11534	Down	5.7e-13	2.97e-12
EGFLAM	45	6	1.70037	0.196121	0.11534	Down	4.87e-10	2.06e-09
TMC6	195	26	12.4733	1.43867	0.11534	Down	4.55e-39	6.33e-38
ADRA1A	53	7	4.2539	0.490918	0.115404	Down	1.2e-11	5.71e-11
CNTN1	223	30	7.28589	0.847893	0.116375	Down	2.77e-44	4.32e-43
IGSF9B	52	7	2.02103	0.235347	0.116449	Down	2.29e-11	1.07e-10
BOLA3-AS1	74	10	3.26597	0.381788	0.116899	Down	1.31e-15	7.92e-15
ANO9	95	13	6.11054	0.723338	0.118375	Down	1.49e-19	1.07e-18
SIRPG	73	10	7.86683	0.932221	0.1185	Down	2.5e-15	1.49e-14
RELN	489	67	7.81505	0.926275	0.118524	Down	2.21e-94	7.8e-93
C17orf100	51	7	6.04948	0.71827	0.118733	Down	4.38e-11	2.01e-10
POM121L9P	50	7	1.76995	0.214354	0.121107	Down	8.33e-11	3.75e-10
GALNS	57	8	4.46072	0.54158	0.121411	Down	3.95e-12	1.95e-11
ZAP70	113	16	8.6029	1.05373	0.122485	Down	1.19e-22	9.7e-22
KIAA0125	1232	175	23.6999	2.91216	0.122877	Down	4.46e-231	5.13e-229
NRN1	42	6	3.77764	0.466836	0.123579	Down	3.38e-09	1.34e-08
AGER	125	18	13.8168	1.72113	0.124567	Down	1.02e-24	8.91e-24
TAPT1-AS1	111	16	8.05913	1.00491	0.124692	Down	4.24e-22	3.4e-21
TCL1A	111	16	12.6707	1.57994	0.124692	Down	4.24e-22	3.4e-21
GNPTG	69	10	10.2488	1.28489	0.12537	Down	3.24e-14	1.82e-13
DTX4	275	40	8.77553	1.10419	0.125826	Down	2.51e-52	4.58e-51
GRIA3	41	6	1.46312	0.185221	0.126593	Down	6.41e-09	2.48e-08
BIVM-ERCC5	41	6	1.47422	0.186625	0.126593	Down	6.41e-09	2.48e-08
SNX29P1	41	6	7.71302	0.976413	0.126593	Down	6.41e-09	2.48e-08
EPHB6	75	11	3.47254	0.440576	0.126874	Down	2.95e-15	1.75e-14
ENTPD1-AS1	150	22	6.50836	0.825744	0.126874	Down	4.01e-29	4.07e-28
GRIN2B	75	11	2.33451	0.296189	0.126874	Down	2.95e-15	1.75e-14
KEL	61	9	4.42889	0.565262	0.127631	Down	1.28e-12	6.51e-12
HAUS7	54	8	4.67943	0.599697	0.128156	Down	2.69e-11	1.25e-10
HIST1H3D	128	19	25.7007	3.30012	0.128406	Down	6.33e-25	5.59e-24
SCARNA2	67	10	29.4998	3.80879	0.129112	Down	1.16e-13	6.29e-13
PCDH9	200	30	5.93943	0.770688	0.129758	Down	6.4e-38	8.58e-37
CXCL12	1355	204	70.6037	9.19518	0.130237	Down	9.01e-247	1.13e-244
FCRL1	750	113	44.7686	5.83489	0.130334	Down	2.25e-137	1.26e-135
LILRB5	53	8	3.95042	0.515821	0.130574	Down	5.07e-11	2.32e-10
MAP2K3	53	8	4.22821	0.552093	0.130574	Down	5.07e-11	2.32e-10
ADGRL3	99	15	2.98898	0.391761	0.131068	Down	2.06e-19	1.48e-18
DLL4	46	7	2.48729	0.327422	0.131638	Down	1.07e-09	4.42e-09
FAM26F	46	7	7.51459	0.989208	0.131638	Down	1.07e-09	4.42e-09
ARHGAP9	391	60	27.8419	3.69586	0.132744	Down	8.67e-72	2.24e-70
MAP4K2	143	22	8.80299	1.17154	0.133085	Down	3.31e-27	3.16e-26
LAYN	65	10	4.33625	0.577089	0.133085	Down	4.09e-13	2.16e-12
ZNF423	104	16	4.10154	0.545853	0.133085	Down	3.55e-20	2.64e-19
KLHL14	130	20	5.64191	0.750852	0.133085	Down	7.27e-25	6.4e-24
FPGS	110	17	8.74159	1.16866	0.13369	Down	3.26e-21	2.53e-20
AFF2	110	17	1.47982	0.197837	0.13369	Down	3.26e-21	2.53e-20
CD40	252	39	27.9215	3.73804	0.133877	Down	1.2e-46	1.96e-45
ARHGEF1	703	109	40.1488	5.385	0.134126	Down	5.19e-127	2.57e-125
CD5	251	39	14.7026	1.97618	0.13441	Down	2.24e-46	3.64e-45
RASAL3	148	23	8.31878	1.11832	0.134434	Down	5.74e-28	5.61e-27
HLA-DQA2	180	28	28.8944	3.88814	0.134564	Down	1.12e-33	1.31e-32
KLRB1	45	7	11.2454	1.51322	0.134564	Down	2.02e-09	8.13e-09
TNFRSF13C	77	12	15.2454	2.05528	0.134813	Down	3.36e-15	1.99e-14
RIN3	218	34	10.4792	1.41382	0.134916	Down	2.08e-40	2.97e-39
ADH1B	709	111	46.5925	6.31008	0.135431	Down	1.94e-127	9.66e-126
MMP9	248	39	19.6324	2.67072	0.136036	Down	1.46e-45	2.34e-44
ARHGEF25	38	6	2.71948	0.371445	0.136587	Down	4.31e-08	1.55e-07
PTGDR	114	18	6.95067	0.949371	0.136587	Down	1.05e-21	8.28e-21
CCDC88B	152	24	5.71311	0.780337	0.136587	Down	1.85e-28	1.84e-27
COL19A1	816	129	17.2949	2.36516	0.136754	Down	1.18e-145	7.24e-144
DNASE1L3	120	19	20.6235	2.82473	0.136966	Down	9.65e-23	7.92e-22
PDK4	409	65	20.4416	2.81027	0.137478	Down	1.12e-73	2.98e-72
STON1	44	7	1.44446	0.19879	0.137622	Down	3.79e-09	1.49e-08
P2RX5	113	18	9.05392	1.24759	0.137796	Down	1.96e-21	1.53e-20
CIITA	978	156	38.8353	5.35864	0.137984	Down	2.23e-173	1.65e-171
RASSF1	75	12	7.07258	0.978903	0.138408	Down	1.17e-14	6.75e-14
LDB2	306	49	20.1162	2.78652	0.138521	Down	2.53e-55	4.89e-54
PRSS35	81	13	5.74784	0.798004	0.138835	Down	1.07e-15	6.47e-15
SLC25A11	56	9	5.7151	0.794548	0.139026	Down	3e-11	1.39e-10
PLEKHG5	87	14	3.05109	0.424723	0.139204	Down	9.71e-17	6.2e-16
LINC01215	354	57	25.2559	3.51784	0.139288	Down	1.47e-63	3.29e-62
CXCL14	1093	176	102.444	14.2699	0.139295	Down	1.44e-192	1.18e-190
CR1	864	140	16.032	2.24721	0.14017	Down	4.2e-152	2.65e-150
LRRC32	74	12	3.17356	0.445183	0.140279	Down	2.19e-14	1.24e-13
TEC	148	24	7.56044	1.06057	0.140279	Down	2.23e-27	2.14e-26
GPR132	123	20	5.87744	0.826713	0.140659	Down	5.74e-23	4.75e-22
CD79A	129	21	18.9628	2.67039	0.140822	Down	5.29e-24	4.54e-23
FNDC9	135	22	11.7426	1.65537	0.140971	Down	4.87e-25	4.32e-24
CDH18	49	8	2.5568	0.361104	0.141233	Down	6.27e-10	2.63e-09
LINC01537	55	9	4.15645	0.588362	0.141554	Down	5.59e-11	2.55e-10
TBC1D22A-AS1	61	10	5.78185	0.819934	0.141812	Down	5.01e-12	2.46e-11
CLECL1	79	13	9.29327	1.3229	0.14235	Down	3.7e-15	2.19e-14
FERMT3	176	29	12.7534	1.81783	0.142537	Down	5.22e-32	5.77e-31
SLCO2A1	91	15	3.98487	0.568206	0.142591	Down	3.07e-17	2e-16
PPP1R12C	109	18	6.79823	0.971144	0.142853	Down	2.35e-20	1.76e-19
DENND1C	230	38	15.0878	2.15638	0.142922	Down	2.68e-41	3.93e-40
RASIP1	36	6	2.01613	0.290677	0.144175	Down	1.51e-07	5.18e-07
ZSWIM8-AS1	36	6	4.55978	0.657407	0.144175	Down	1.51e-07	5.18e-07
LINC00282	72	12	3.22699	0.465252	0.144175	Down	7.59e-14	4.17e-13
LILRB1	132	22	7.65204	1.10323	0.144175	Down	3.12e-24	2.69e-23
SH3RF3	66	11	2.17403	0.313441	0.144175	Down	8.4e-13	4.33e-12
ENAM	90	15	2.93324	0.4229	0.144175	Down	5.7e-17	3.66e-16
GALT	54	9	7.10741	1.02471	0.144175	Down	1.04e-10	4.66e-10
KIAA0226L	640	107	29.744	4.30176	0.144626	Down	3.11e-111	1.3e-109
ADGRE5	272	46	14.4042	2.10727	0.146295	Down	6.07e-48	1.03e-46
FCRL3	501	85	30.688	4.50393	0.146765	Down	9.45e-87	3.02e-85
REREP3	53	9	12.1903	1.7907	0.146896	Down	1.94e-10	8.5e-10
ITGB7	153	26	9.86865	1.45071	0.147002	Down	1.43e-27	1.39e-26
CHRDL1	394	67	17.7664	2.61349	0.147103	Down	1.68e-68	4.13e-67
LOC148413	47	8	4.97222	0.732124	0.147243	Down	2.17e-09	8.75e-09
CTLA4	135	23	12.6404	1.86293	0.147379	Down	1.82e-24	1.59e-23
SIPA1	311	53	15.8434	2.33564	0.14742	Down	2.35e-54	4.47e-53
PLD5	41	7	2.29407	0.338815	0.147692	Down	2.46e-08	9.06e-08
CYBA	41	7	10.4867	1.5488	0.147692	Down	2.46e-08	9.06e-08
GAS1	35	6	2.28867	0.339397	0.148295	Down	2.81e-07	9.38e-07
MDGA1	70	12	1.45332	0.215519	0.148295	Down	2.61e-13	1.39e-12
LOC283710	35	6	6.27166	0.930053	0.148295	Down	2.81e-07	9.38e-07
B3GNTL1	35	6	4.67994	0.694009	0.148295	Down	2.81e-07	9.38e-07
CCDC3	163	28	9.12584	1.35608	0.148598	Down	4.18e-29	4.24e-28
KLF2	58	10	6.50431	0.970097	0.149147	Down	3.21e-11	1.48e-10
POU2AF1	464	80	28.3091	4.22221	0.149147	Down	9.45e-80	2.77e-78
SASH3	347	60	23.828	3.56411	0.149577	Down	5.7e-60	1.2e-58
TMEM8A	52	9	2.63021	0.393797	0.14972	Down	3.59e-10	1.55e-09
CXCR5	150	26	9.55517	1.43272	0.149942	Down	8.99e-27	8.45e-26
APBB1	75	13	5.16741	0.774813	0.149942	Down	4.37e-14	2.44e-13
CD37	375	65	55.7897	8.36524	0.149942	Down	1.38e-64	3.15e-63
CD79B	288	50	42.1347	6.32789	0.150183	Down	6.12e-50	1.06e-48
SLC26A7	840	146	29.2756	4.40171	0.150354	Down	2.8e-142	1.65e-140
APLNR	310	54	14.7901	2.22867	0.150686	Down	1.57e-53	2.93e-52
GPX3	103	18	10.8161	1.63512	0.151174	Down	9.41e-19	6.56e-18
LOC101927972	40	7	13.4981	2.0434	0.151384	Down	4.56e-08	1.64e-07
MTRNR2L8	40	7	5.73409	0.868049	0.151384	Down	4.56e-08	1.64e-07
MXD4	194	34	9.50843	1.44154	0.151607	Down	5.63e-34	6.62e-33
WDFY4	2008	352	37.0846	5.6236	0.151643	Down	0	0
SLCO5A1	57	10	2.78118	0.422082	0.151763	Down	5.94e-11	2.7e-10
LBH	524	92	32.9817	5.00924	0.151879	Down	6.46e-89	2.1e-87
CCM2	131	23	12.7904	1.9426	0.151879	Down	2.1e-23	1.77e-22
ACTG1P20	74	13	5.16003	0.784162	0.151969	Down	8.06e-14	4.43e-13
FCMR	1728	304	103.582	15.7636	0.152185	Down	1.26e-288	1.86e-286
PLEKHF1	34	6	3.61554	0.551935	0.152656	Down	5.22e-07	1.7e-06
PAPPA	136	24	2.29259	0.349978	0.152656	Down	3.57e-24	3.08e-23
ADHFE1	45	8	4.39134	0.675331	0.153787	Down	7.45e-09	2.88e-08
TLL1	146	26	3.71375	0.572104	0.15405	Down	1.03e-25	9.33e-25
PTGDS	258	46	58.7567	9.06229	0.154234	Down	3.09e-44	4.8e-43
RNASE6	241	43	42.0045	6.48319	0.154345	Down	2.08e-41	3.06e-40
RAC2	409	73	50.0556	7.72849	0.154398	Down	4.01e-69	9.99e-68
JCHAIN	5268	941	691.399	106.835	0.15452	Down	0	0
SOBP	50	9	1.48367	0.231021	0.155709	Down	1.22e-09	5.01e-09
MAN2C1	111	20	6.16044	0.960198	0.155865	Down	9.05e-20	6.6e-19
DACT1	61	11	2.92162	0.455752	0.155993	Down	1.81e-11	8.55e-11
CD5L	94	17	7.77062	1.21568	0.156445	Down	6.37e-17	4.09e-16
BACH2	1683	305	33.5375	5.2576	0.156768	Down	2.87e-276	4.04e-274
TMEM134	33	6	5.51763	0.867825	0.157282	Down	9.65e-07	3.06e-06
NETO1	44	8	1.28969	0.202846	0.157282	Down	1.37e-08	5.16e-08
DCANP1	82	15	4.83694	0.765402	0.158241	Down	7.61e-15	4.42e-14
ASAP1-IT1	71	13	11.1362	1.76387	0.15839	Down	5e-13	2.62e-12
C10orf54	131	24	5.07544	0.80437	0.158483	Down	7.38e-23	6.09e-22
SLAMF1	98	18	7.86912	1.2503	0.158887	Down	1.96e-17	1.29e-16
NCF1	299	55	37.8974	6.03036	0.159123	Down	4.31e-50	7.52e-49
COL4A3	277	51	6.3263	1.00759	0.159269	Down	1.68e-46	2.74e-45
RAB37	76	14	4.61552	0.73549	0.159352	Down	8.34e-14	4.58e-13
DXO	65	12	7.5598	1.20731	0.159702	Down	5.51e-12	2.69e-11
AGAP2	146	27	4.62469	0.739836	0.159975	Down	3.58e-25	3.18e-24
SGSH	54	10	3.60763	0.577923	0.160195	Down	3.69e-10	1.59e-09
ORAI2	162	30	2.77104	0.443906	0.160195	Down	9.55e-28	9.28e-27
MCOLN1	54	10	4.75973	0.762484	0.160195	Down	3.69e-10	1.59e-09
HLA-DOA	633	118	33.5985	5.41801	0.161258	Down	2.59e-103	9.98e-102
MMRN1	793	148	29.512	4.76462	0.161447	Down	7.08e-129	3.55e-127
SEMA7A	75	14	4.10821	0.663379	0.161476	Down	1.52e-13	8.25e-13
PTCH1	107	20	2.45769	0.397389	0.161692	Down	1.01e-18	7.03e-18
LY86	107	20	22.5107	3.6398	0.161692	Down	1.01e-18	7.03e-18
CCBE1	32	6	0.9453	0.153325	0.162197	Down	1.78e-06	5.49e-06
SLC9A9-AS1	32	6	11.4239	1.85292	0.162197	Down	1.78e-06	5.49e-06
GIPC3	48	9	2.05614	0.3335	0.162197	Down	4.12e-09	1.62e-08
LINC00926	637	120	46.8191	7.62968	0.162961	Down	2.74e-103	1.05e-101
CELF2-AS1	334	63	24.0049	3.91685	0.163168	Down	6.23e-55	1.2e-53
AOC3	169	32	7.75104	1.2696	0.163797	Down	1.66e-28	1.65e-27
SH3BP1	116	22	8.32734	1.3662	0.164061	Down	5.22e-20	3.85e-19
CCL21	2750	522	568.203	93.3004	0.164203	Down	0	0
BTLA	805	153	46.303	7.61284	0.164414	Down	2.45e-129	1.23e-127
ABCG1	163	31	9.66421	1.58995	0.164519	Down	1.78e-27	1.71e-26
P2RY8	63	12	2.75159	0.453384	0.164772	Down	1.84e-11	8.68e-11
SVEP1	1050	200	15.7312	2.59206	0.164772	Down	6.64e-168	4.68e-166
GZMB	42	8	8.3875	1.38202	0.164772	Down	4.62e-08	1.66e-07
CYTH4	303	58	17.856	2.95673	0.165587	Down	1.53e-49	2.65e-48
PCDHAC2	47	9	1.43993	0.238522	0.165648	Down	7.53e-09	2.91e-08
ARHGAP6	47	9	1.63866	0.271441	0.165648	Down	7.53e-09	2.9e-08
ACAP1	412	79	30.3783	5.0389	0.165872	Down	1.08e-66	2.56e-65
SPIB	130	25	6.81024	1.13293	0.166356	Down	4.54e-22	3.64e-21
CARD11	731	141	30.5077	5.09042	0.166857	Down	1.55e-116	6.9e-115
ANGPT1	57	11	2.42985	0.405638	0.16694	Down	2.03e-10	8.89e-10
DCHS1	171	33	2.93913	0.490657	0.16694	Down	1.68e-28	1.67e-27
VWF	987	191	20.6635	3.45908	0.167401	Down	2.24e-156	1.45e-154
TIFAB	31	6	4.50326	0.753978	0.167429	Down	3.26e-06	9.77e-06
TMEM198B	93	18	5.03748	0.843422	0.167429	Down	3.94e-16	2.44e-15
TLR10	1600	310	74.1551	12.4287	0.167604	Down	4.21e-252	5.48e-250
RLTPR	201	39	8.29868	1.3929	0.167846	Down	4e-33	4.58e-32
ADAMTS7	36	7	1.21262	0.203968	0.168204	Down	5.22e-07	1.7e-06
CERK	360	70	14.977	2.5192	0.168204	Down	5.54e-58	1.12e-56
LSM10	36	7	7.18153	1.20796	0.168204	Down	5.22e-07	1.7e-06
MYO1G	437	85	24.6453	4.1468	0.168259	Down	5.22e-70	1.32e-68
PRKCB	2111	411	48.7117	8.20405	0.168421	Down	0	0
HMCN1	200	39	2.0308	0.342565	0.168685	Down	7.23e-33	8.23e-32
MATN2	271	53	12.1992	2.06387	0.16918	Down	6.77e-44	1.04e-42
C7	3347	655	154.234	26.1101	0.169289	Down	0	0
SOCS3	51	10	3.44579	0.584469	0.169618	Down	2.25e-09	9.03e-09
PMF1	56	11	9.18064	1.55998	0.169921	Down	3.69e-10	1.59e-09
APBA2	61	12	3.10156	0.527806	0.170174	Down	6.09e-11	2.76e-10
SNRK-AS1	71	14	3.77831	0.64448	0.170574	Down	1.67e-12	8.44e-12
BCL6B	71	14	3.72472	0.635338	0.170574	Down	1.67e-12	8.44e-12
POU2F2	334	66	8.89469	1.52044	0.170938	Down	2.26e-53	4.2e-52
LHFP	404	80	34.6197	5.93027	0.171297	Down	4.03e-64	9.13e-63
SEMA3D	585	116	17.2868	2.96523	0.171532	Down	5.43e-92	1.84e-90
MYO15B	176	35	3.41196	0.58695	0.172027	Down	9.29e-29	9.34e-28
STAB1	176	35	4.10632	0.706399	0.172027	Down	9.29e-29	9.34e-28
MYCT1	221	44	13.4303	2.31306	0.172227	Down	1.08e-35	1.36e-34
HVCN1	456	91	48.5746	8.38547	0.172631	Down	8.51e-72	2.2e-70
CDH17	35	7	1.74976	0.302726	0.17301	Down	9.51e-07	3.02e-06
C1QTNF7	30	6	1.22792	0.212442	0.17301	Down	5.95e-06	1.73e-05
BCL3	35	7	3.47229	0.600742	0.17301	Down	9.51e-07	3.01e-06
LMBR1L	40	8	2.90191	0.502061	0.17301	Down	1.53e-07	5.25e-07
ADPRHL2	35	7	3.82753	0.662202	0.17301	Down	9.51e-07	3.01e-06
MAP2K7	45	9	2.36074	0.408432	0.17301	Down	2.49e-08	9.17e-08
MRPL2	35	7	4.87743	0.843846	0.17301	Down	9.51e-07	3.01e-06
PTN	145	29	17.3554	3.00266	0.17301	Down	7.13e-24	6.09e-23
HLA-DMB	489	98	64.7301	11.2219	0.173364	Down	1.17e-76	3.32e-75
ADAM19	1245	250	35.2628	6.12533	0.173705	Down	4.2e-192	3.39e-190
CNKSR2	154	31	4.94502	0.861094	0.174134	Down	3.67e-25	3.26e-24
HIST1H4F	99	20	49.7487	8.69397	0.174758	Down	1.18e-16	7.49e-16
LOC401312	99	20	7.06308	1.23433	0.174758	Down	1.18e-16	7.49e-16
MFHAS1	153	31	5.38409	0.94368	0.175272	Down	6.6e-25	5.82e-24
NPRL3	69	14	4.30347	0.755334	0.175518	Down	5.46e-12	2.67e-11
ST3GAL2	113	23	4.69583	0.826806	0.176072	Down	1.01e-18	7e-18
CD52	113	23	41.3791	7.28572	0.176072	Down	1.01e-18	7e-18
C1orf162	447	91	80.2536	14.1332	0.176107	Down	1.66e-69	4.14e-68
CTBP1	334	68	24.875	4.38095	0.176118	Down	2.33e-52	4.24e-51
PLEKHH2	750	153	19.9444	3.5196	0.176471	Down	2.89e-115	1.27e-113
PIK3CD	598	122	20.437	3.60677	0.176482	Down	2.88e-92	9.83e-91
SELO	44	9	3.51476	0.62191	0.176942	Down	4.52e-08	1.62e-07
SLAMF6	518	106	34.8838	6.17506	0.177018	Down	5.33e-80	1.57e-78
EBF3	420	86	17.6039	3.11816	0.17713	Down	3.65e-65	8.41e-64
NUMBL	39	8	2.02245	0.358876	0.177446	Down	2.78e-07	9.28e-07
ATP2A3	1481	304	56.0641	9.95509	0.177566	Down	7.9e-225	8.41e-223
SLA	496	102	26.517	4.71721	0.177894	Down	2e-76	5.61e-75
FLRT2	1016	209	26.1712	4.65713	0.177949	Down	1.27e-154	8.23e-153
L1TD1	34	7	1.5758	0.280647	0.178099	Down	1.72e-06	5.33e-06
ASB3	68	14	5.13679	0.914856	0.178099	Down	9.84e-12	4.71e-11
SNX22	136	28	6.86963	1.22347	0.178099	Down	4.41e-22	3.54e-21
LOC653160	63	13	6.17394	1.10207	0.178503	Down	5.94e-11	2.7e-10
FRAT1	29	6	2.02294	0.362057	0.178976	Down	1.08e-05	3.05e-05
HBEGF	29	6	2.2743	0.407046	0.178976	Down	1.08e-05	3.05e-05
IL16	1737	360	38.5981	6.92007	0.179285	Down	1.24e-261	1.66e-259
FAM117A	82	17	6.42261	1.15183	0.17934	Down	8.16e-14	4.48e-13
TNXB	159	33	2.24023	0.402208	0.179539	Down	1.96e-25	1.76e-24
CHMP6	48	10	5.33435	0.961352	0.180219	Down	1.33e-08	5e-08
LOC728392	72	15	8.91798	1.60719	0.180219	Down	2.94e-12	1.46e-11
HSPG2	617	129	7.95498	1.43875	0.180862	Down	1.36e-93	4.7e-92
LINC00996	124	26	11.224	2.03583	0.181382	Down	4.98e-20	3.67e-19
PHACTR1	100	21	6.41875	1.16604	0.181661	Down	2.06e-16	1.29e-15
KIF21B	409	86	7.60906	1.38404	0.181893	Down	2.17e-62	4.73e-61
DEXI	214	45	26.365	4.79587	0.181903	Down	2.04e-33	2.36e-32
PSTPIP1	114	24	11.3646	2.06968	0.182116	Down	1.75e-18	1.21e-17
THEMIS2	76	16	5.15942	0.939613	0.182116	Down	8.77e-13	4.51e-12
TRPC1	128	27	5.67633	1.03577	0.182472	Down	1.5e-20	1.13e-19
CADM3-AS1	90	19	5.05258	0.922712	0.182622	Down	7.33e-15	4.26e-14
RABEP2	52	11	4.21757	0.771781	0.182992	Down	3.92e-09	1.54e-08
TGFB1	274	58	19.6164	3.59203	0.183113	Down	3.74e-42	5.57e-41
TMEM132B	33	7	0.559247	0.102619	0.183496	Down	3.12e-06	9.37e-06
GP6	33	7	2.69307	0.494167	0.183496	Down	3.12e-06	9.37e-06
IER2	94	20	8.49603	1.56372	0.184054	Down	2.2e-15	1.31e-14
LGALS2	47	10	16.4611	3.02972	0.184054	Down	2.39e-08	8.81e-08
HMHA1	351	75	11.8533	2.19096	0.18484	Down	3.37e-53	6.22e-52
ATG16L2	126	27	10.8627	2.0136	0.185368	Down	4.78e-20	3.53e-19
NT5C	28	6	5.11143	0.947497	0.185368	Down	1.95e-05	5.37e-05
LOC100303749	28	6	6.73326	1.24813	0.185368	Down	1.95e-05	5.38e-05
RAB39A	56	12	5.57361	1.03317	0.185368	Down	1.16e-09	4.76e-09
ABI3BP	1528	329	63.1711	11.7661	0.186258	Down	2.18e-224	2.31e-222
TRAF3IP3	505	109	41.1758	7.68811	0.186714	Down	2.89e-75	7.93e-74
SELPLG	111	24	7.80776	1.46035	0.187038	Down	9.96e-18	6.64e-17
BRD7P3	74	16	5.5605	1.04003	0.187038	Down	2.8e-12	1.4e-11
PPP1R16B	688	149	20.3532	3.81305	0.187344	Down	1.18e-101	4.46e-100
LINC00341	184	40	12.0489	2.26585	0.188055	Down	2.57e-28	2.55e-27
PLEKHM3	363	79	6.84486	1.28863	0.188262	Down	2.86e-54	5.44e-53
PYGO1	101	22	2.22455	0.419166	0.188427	Down	3.51e-16	2.18e-15
NLRP1	793	173	26.126	4.93046	0.188719	Down	2.74e-116	1.22e-114
R3HDM4	32	7	3.27119	0.619007	0.18923	Down	5.6e-06	1.64e-05
KCND1	32	7	1.25372	0.237242	0.18923	Down	5.6e-06	1.64e-05
HLA-DOB	242	53	32.6178	6.17956	0.189453	Down	1.45e-36	1.87e-35
SLC14A1	73	16	3.19439	0.605657	0.1896	Down	5e-12	2.45e-11
CD180	693	152	47.2017	8.95591	0.189737	Down	1.82e-101	6.86e-100
DPY19L2	41	9	1.86884	0.354873	0.189889	Down	2.62e-07	8.78e-07
ANKRD29	296	65	16.2861	3.09372	0.189961	Down	2.78e-44	4.33e-43
LOC729683	50	11	3.93791	0.749429	0.190311	Down	1.26e-08	4.73e-08
LOC613037	100	22	5.35237	1.01862	0.190311	Down	6.24e-16	3.82e-15
ATP13A2	59	13	2.70063	0.514752	0.190605	Down	6.1e-10	2.57e-09
HIST1H3C	95	21	38.2741	7.31885	0.191222	Down	3.71e-15	2.19e-14
FAM65B	3025	671	98.5199	18.9044	0.191884	Down	0	0
RAMP2	27	6	6.35236	1.22114	0.192234	Down	3.51e-05	9.37e-05
FBXL14	72	16	6.30722	1.21246	0.192234	Down	8.88e-12	4.28e-11
MIR4697HG	54	12	1.882	0.361785	0.192234	Down	3.69e-09	1.46e-08
LOC101928673	36	8	3.65985	0.703547	0.192234	Down	1.62e-06	5.01e-06
ZNF300P1	54	12	4.12641	0.793235	0.192234	Down	3.69e-09	1.46e-08
NCF1B	126	28	15.3697	2.95457	0.192234	Down	1.43e-19	1.03e-18
LRCH2	143	32	5.36938	1.03939	0.193578	Down	6.55e-22	5.22e-21
CLEC9A	58	13	6.17479	1.19724	0.193891	Down	1.09e-09	4.47e-09
FAM65C	58	13	2.36351	0.458263	0.193891	Down	1.09e-09	4.47e-09
ITGAD	58	13	2.74172	0.531595	0.193891	Down	1.09e-09	4.47e-09
CST3	330	74	27.7639	5.38567	0.193981	Down	1.85e-48	3.15e-47
MICU3	156	35	7.23556	1.40429	0.194082	Down	1.01e-23	8.53e-23
ZFAND2A	49	11	10.0569	1.95301	0.194195	Down	2.24e-08	8.27e-08
ZBTB17	49	11	3.26886	0.634798	0.194195	Down	2.24e-08	8.27e-08
CD226	227	51	14.9016	2.89614	0.194351	Down	8.61e-34	1e-32
UBASH3A	89	20	6.43907	1.25171	0.194394	Down	3.91e-14	2.19e-13
GLTSCR1	40	9	1.2889	0.250866	0.194637	Down	4.68e-07	1.53e-06
SYNE3	120	27	6.77585	1.31883	0.194637	Down	1.49e-18	1.03e-17
GPR176	142	32	5.80443	1.13152	0.194941	Down	1.16e-21	9.14e-21
EBF1	599	135	20.991	4.09244	0.194962	Down	3e-86	9.56e-85
CR2	1072	242	47.5393	9.28358	0.195282	Down	1.01e-152	6.44e-151
PKHD1L1	217	49	2.86285	0.559213	0.195334	Down	2.94e-32	3.27e-31
MTFR1L	62	14	5.45188	1.06494	0.195334	Down	3.2e-10	1.38e-09
C3orf70	53	12	1.6609	0.325306	0.195861	Down	6.55e-09	2.54e-08
CETP	106	24	11.4164	2.23603	0.195861	Down	1.75e-16	1.1e-15
DEF6	260	59	20.9409	4.1107	0.1963	Down	3.35e-38	4.55e-37
[truncated: 1,934 more rows]
